# Supplementary material for: Clinical presentation, disease course and outcome of COVID-19 in hospitalized patients with and without pre-existing cardiac disease – a cohort study across eighteen countries
Source: bioRxiv or medRxiv preprint supplement (doi:10.1101/2021.03.11.21253106), 2021-07-06
Supplement: Supplementary file [file media-1.pdf]

## **Supplementary Appendix**

**Clinical presentation, disease course and outcome of COVID-19 in hospitalized patients with and without pre-existing cardiac disease – a cohort study across eighteen countries**

## Content

|                                                                                                                       |         |
|-----------------------------------------------------------------------------------------------------------------------|---------|
| Table S1 Contributing hospitals.....                                                                                  | 3 – 6   |
| Figure S1 Selection of study population.....                                                                          | 7       |
| Table S2 Baseline characteristics stratified by data source and age .....                                             | 8       |
| Table S3 Detailed specification of pre-existing cardiac disease in CAPACITY.....                                      | 9 – 10  |
| Figure S2 Complaints at presentation stratified by age.....                                                           | 11      |
| Figure S3 Complaints at presentation stratified by age and prior history of cardiac disease.....                      | 12      |
| Table S4 Complaints, vitals and laboratory values at admission stratified by data source and age.....                 | 13 – 14 |
| Table S5 Baseline characteristics stratified by admission to a critical care unit.....                                | 15      |
| Table S6 Complaints, vitals and laboratory values at admission stratified by admission to a critical care unit.....   | 16 – 17 |
| Table S7 Baseline characteristics stratified by mortality.....                                                        | 18      |
| Table S8 Complaints, vitals and laboratory values at admission stratified by mortality.....                           | 19 – 20 |
| Table S9 Outcome at discharge stratified by data source and age.....                                                  | 21      |
| Table S10 Outcome at discharge stratified by admission to a critical care unit.....                                   | 22      |
| Table S11 Outcome at discharge stratified by mortality.....                                                           | 23      |
| Table S12 Subgroup analyses of having any history of cardiac disease among clinically relevant subgroups .....        | 24      |
| Table S13 Sensitivity analyses between centers with and without a selective inclusion strategy.....                   | 25      |
| Table S14 Associations across data sources between pre-existent heart disease subtypes and in-hospital mortality..... | 26      |
| Table S15 Subgroup analyses for patients that were admitted to a critical care unit.....                              | 27      |

| <b>Table S1: Contributing hospitals</b> |                                                     |
|-----------------------------------------|-----------------------------------------------------|
| <b>CAPACITY-COVID</b>                   |                                                     |
| <b>Country</b>                          | <b>Site name</b>                                    |
| Belgium                                 | Antwerp University Hospital                         |
|                                         | AZ Maria Middelaes                                  |
|                                         | CHU UCL Namur – Site Godinne                        |
|                                         | Jessa Hospital                                      |
|                                         | University Hospital Brussels                        |
| Egypt                                   | One Day Surgery Hospital                            |
| France                                  | SSR Val Rosay                                       |
| Iran                                    | Tehran Heart Center                                 |
| Israel                                  | EMMS Hospital                                       |
| Italy                                   | San Luigi Gonzaga University Hospital               |
| Netherlands                             | Admiraal de Ruyter Hospital                         |
|                                         | Albert Schweitzer Hospital                          |
|                                         | Amphia Hospital                                     |
|                                         | Amstelland Hospital                                 |
|                                         | Amsterdam University Medical Center                 |
|                                         | Antonius Hospital                                   |
|                                         | Beatrix Hospital                                    |
|                                         | Bernhoven Hospital                                  |
|                                         | Bravis Hospital                                     |
|                                         | Catharina Hospital                                  |
|                                         | Deventer Hospital                                   |
|                                         | Diakonessenhuis                                     |
|                                         | Dijklander Hospital, location Hoorn                 |
|                                         | Elizabeth-TweeSteden Hospital                       |
|                                         | Erasmus University Medical Center                   |
|                                         | Franciscus Gasthuis                                 |
|                                         | Franciscus Vlietland                                |
|                                         | Gelre Hospitals, location Apeldoorn                 |
|                                         | Gelre Hospitals, location Zutphen                   |
|                                         | Groene Hart Hospital                                |
|                                         | Haaglanden Medical Center                           |
|                                         | Hospital Group Twente                               |
|                                         | Ikazia Hospital                                     |
|                                         | Isala                                               |
|                                         | Jeroen Bosch Hospital                               |
|                                         | LangeLand Hospital                                  |
|                                         | Leiden University Medical Center                    |
|                                         | Maasstad Hospital                                   |
|                                         | Maastricht University Medical Center                |
|                                         | Martini Hospital                                    |
|                                         | Meander Medical Center                              |
|                                         | Medical Center Leeuwarden                           |
|                                         | Medisch Spectrum Twente                             |
|                                         | Rijnstate Hospital                                  |
|                                         | Rode Kruis Hospital                                 |
|                                         | Saxenburgh Medical Center                           |
|                                         | Slingeland Hospital                                 |
|                                         | Spaarne Gasthuis                                    |
|                                         | St. Antonius Hospital                               |
|                                         | St. Jansdal                                         |
| Treant Zorggroep                        |                                                     |
| University Medical Center Utrecht       |                                                     |
| van Weel-Bethesda Hospital              |                                                     |
| Zaans Medical Center                    |                                                     |
| Zuyderland Medical Center               |                                                     |
| Portugal                                | Hospital do Espirito Santo                          |
|                                         | Hospital Prof. Doutor Fernando Fonesca              |
| Russia                                  | I.M. Sechenov First Moscow State Medical University |

|                                          |                                                                                                    |
|------------------------------------------|----------------------------------------------------------------------------------------------------|
| Saudi Arabia                             | King Fahd Hospital of the University                                                               |
| Spain                                    | INCLIVA Research Institute, University of Valencia                                                 |
|                                          | University Hospital Complex of Granada                                                             |
| Switzerland                              | University Hospital of Geneva                                                                      |
| United Kingdom                           | Barts Health NHS Trust                                                                             |
|                                          | Leeds Teaching Hospitals NHS Trust                                                                 |
|                                          | Northumbria Healthcare NHS Foundation Trust                                                        |
|                                          | Royal Brompton and Harefield NHS Foundation Trust                                                  |
|                                          | Royal Devon and Exeter NHS Foundation Trust                                                        |
|                                          | Royal Free London NHS Foundation Trust                                                             |
|                                          | Salford Royal NHS Foundation Trust                                                                 |
|                                          | Southern Health and Social Care Trust                                                              |
|                                          | The Newcastle upon Tyne Hospitals NHS Foundation Trust                                             |
|                                          | University College London Hospitals NHS Foundation Trust                                           |
|                                          | University Hospitals Bristol NHS Foundation Trust                                                  |
|                                          | University Hospitals of Leicester NHS Trust                                                        |
|                                          | <b>LEOSS</b>                                                                                       |
| <b>Country</b>                           | <b>Site name</b>                                                                                   |
| Austria                                  | Medical University Graz                                                                            |
| Belgium                                  | National MS Center Melsbroek                                                                       |
| Bosnia and Herzegovina                   | Clinic for Infectious Diseases University Clinical Hospital Mostar                                 |
| Germany                                  | Agaplesion Diakonie Hospital Rotenburg                                                             |
|                                          | ARCIM Institute at Filderklinik                                                                    |
|                                          | Bethesda Hospital Bergedorf                                                                        |
|                                          | Bundeswehr Hospital Koblenz                                                                        |
|                                          | Catholic Hospital Bochum (St. Josef Hospital) Ruhr University Bochum                               |
|                                          | Clinic Munich                                                                                      |
|                                          | Department of Nephrology and Internal Intensive Care Medicine, Charité Universitaetsmedizin Berlin |
|                                          | Elbland Hospital Riesa                                                                             |
|                                          | Elisabeth Hospital Essen                                                                           |
|                                          | Evangelisches Hospital Herne                                                                       |
|                                          | Evangelisches Hospital Saarbruecken                                                                |
|                                          | German Heart Center Munich                                                                         |
|                                          | Hegau-Bodensee Hospital Singen                                                                     |
|                                          | Helios Hospital Pirna                                                                              |
|                                          | Hospital Braunschweig                                                                              |
|                                          | Hospital Bremen-Center                                                                             |
|                                          | Hospital Dortmund gGmbH                                                                            |
|                                          | Hospital Ernst von Bergmann                                                                        |
|                                          | Hospital Fulda                                                                                     |
|                                          | Hospital Ingolstadt                                                                                |
|                                          | Hospital Kreuznacher Diakonie Hunsrueck                                                            |
|                                          | Hospital Leverkusen                                                                                |
|                                          | Hospital Maria Hilf GmbH Moenchengladbach                                                          |
|                                          | Hospital Mutterhaus Borromaeerinnen Trier                                                          |
|                                          | Hospital Nuremberg North                                                                           |
|                                          | Hospital of the Augustinian Cologne                                                                |
|                                          | Hospital Oldenburg University Oldenburg                                                            |
|                                          | Hospital Osnabrueck                                                                                |
|                                          | Hospital Passau                                                                                    |
|                                          | Hospital Preetz                                                                                    |
|                                          | Hospital Saar Sulzbach                                                                             |
|                                          | Hospital Sankt Georg Leipzig                                                                       |
| Hospital South-Eastern Bavaria Trostberg |                                                                                                    |
| Hospital St. Josef Wiesbaden             |                                                                                                    |
| Hospital St. Joseph-Stift Dresden        |                                                                                                    |
| Hospital Stuttgart                       |                                                                                                    |
| Hospital zum Heiligen Geist, Kempen      |                                                                                                    |
| Hospitals of Cologne gGmbH               |                                                                                                    |

|        |                                                                                    |
|--------|------------------------------------------------------------------------------------|
|        | Johannes Wesling Hospital Minden Ruhr University Bochum                            |
|        | Maltes Hospital St. Hildegardis Cologne                                            |
|        | Malteser Hospital St. Franziskus Flensburg                                         |
|        | Marien Hospital Herne Ruhr University Bochum                                       |
|        | Medical practice U. Kronawitter & C. Jung Oncology Traunstein                      |
|        | Medical School Hannover                                                            |
|        | Municipal Hospital Karlsruhe                                                       |
|        | Nephrological Center Villingen-Schwenningen                                        |
|        | Oberlausitz Hospital                                                               |
|        | Otto-von-Guericke-University Magdeburg                                             |
|        | Petrus Hospital Wuppertal                                                          |
|        | Practice at Ebertplatz Cologne                                                     |
|        | Practice Dr. Boebel Reutlingen                                                     |
|        | Practice for general medicine Drs. Elisabeth Schroedter & Gabriele Mueller-Joerger |
|        | Practice Gotenring Cologne                                                         |
|        | Robert-Bosch-Hospital Stuttgart                                                    |
|        | Robert-Koch-Institute                                                              |
|        | Sankt Vincenz Hospital Menden                                                      |
|        | Schwerpunktpraxis Onkologie und Haematologie                                       |
|        | SHG Clinics Voelklingen Lung Center Saar                                           |
|        | Sophien- and Hufeland Clinic Weimar                                                |
|        | Sophien Hospital GmbH Hannover                                                     |
|        | Srh Wald-Hospital Gera                                                             |
|        | St. Vincenz Hospital Datteln                                                       |
|        | St. Vincenz Hospital Limburg/Lahn                                                  |
|        | Technical University of Munich                                                     |
|        | Thorax-Hospital Heidelberg                                                         |
|        | Tropical Clinic Paul-Lechler Hospital Tuebingen                                    |
|        | University Heart Center Freiburg Bad Krozingen                                     |
|        | University Hospital Augsburg                                                       |
|        | University Hospital Bonn                                                           |
|        | University Hospital Cologne                                                        |
|        | University Hospital Dresden                                                        |
|        | University Hospital Duesseldorf                                                    |
|        | University Hospital Erlangen                                                       |
|        | University Hospital Essen                                                          |
|        | University Hospital Frankfurt                                                      |
|        | University Hospital Freiburg                                                       |
|        | University Hospital Goettingen                                                     |
|        | University Hospital Hamburg-Eppendorf                                              |
|        | University Hospital Heidelberg                                                     |
|        | University Hospital Jena                                                           |
|        | University Hospital Muenster                                                       |
|        | University Hospital Munich/ LMU                                                    |
|        | University Hospital of Giessen and Marburg                                         |
|        | University Hospital Regensburg                                                     |
|        | University Hospital Rostock                                                        |
|        | University Hospital RWTH Aachen                                                    |
|        | University Hospital Saarland                                                       |
|        | University Hospital Schleswig-Holstein - Kiel                                      |
|        | University Hospital Schleswig-Holstein - Luebeck                                   |
|        | University Hospital Tuebingen                                                      |
|        | University Hospital Ulm                                                            |
|        | University Hospital Wuerzburg                                                      |
|        | University Medicine of the Johannes Gutenberg University Mainz                     |
|        | Zeisigwald Hospitals Bethanien Chemnitz                                            |
| Italy  | Sant' Andrea Hospital University of Rome                                           |
| Latvia | P. Stradins University Hospital                                                    |
| Spain  | Complejo Hospitalario de Navarra                                                   |
|        | University Hospital Arnau de Vilanova Lleida                                       |

|             |                                                                |
|-------------|----------------------------------------------------------------|
| Switzerland | Department of Neurology, Inselspital, Bern University Hospital |
|             | Kantonsspital St. Gallen                                       |
|             | Luzerner Kantonsspital Neurology                               |
|             | Neurocenter of Southern Switzerland, EOC                       |
|             | University Hospital Basel                                      |
| Turkey      | Hacettepe University                                           |
|             | Pamukkale University School of Medicine                        |
|             | University of Health Sciences Istanbul                         |

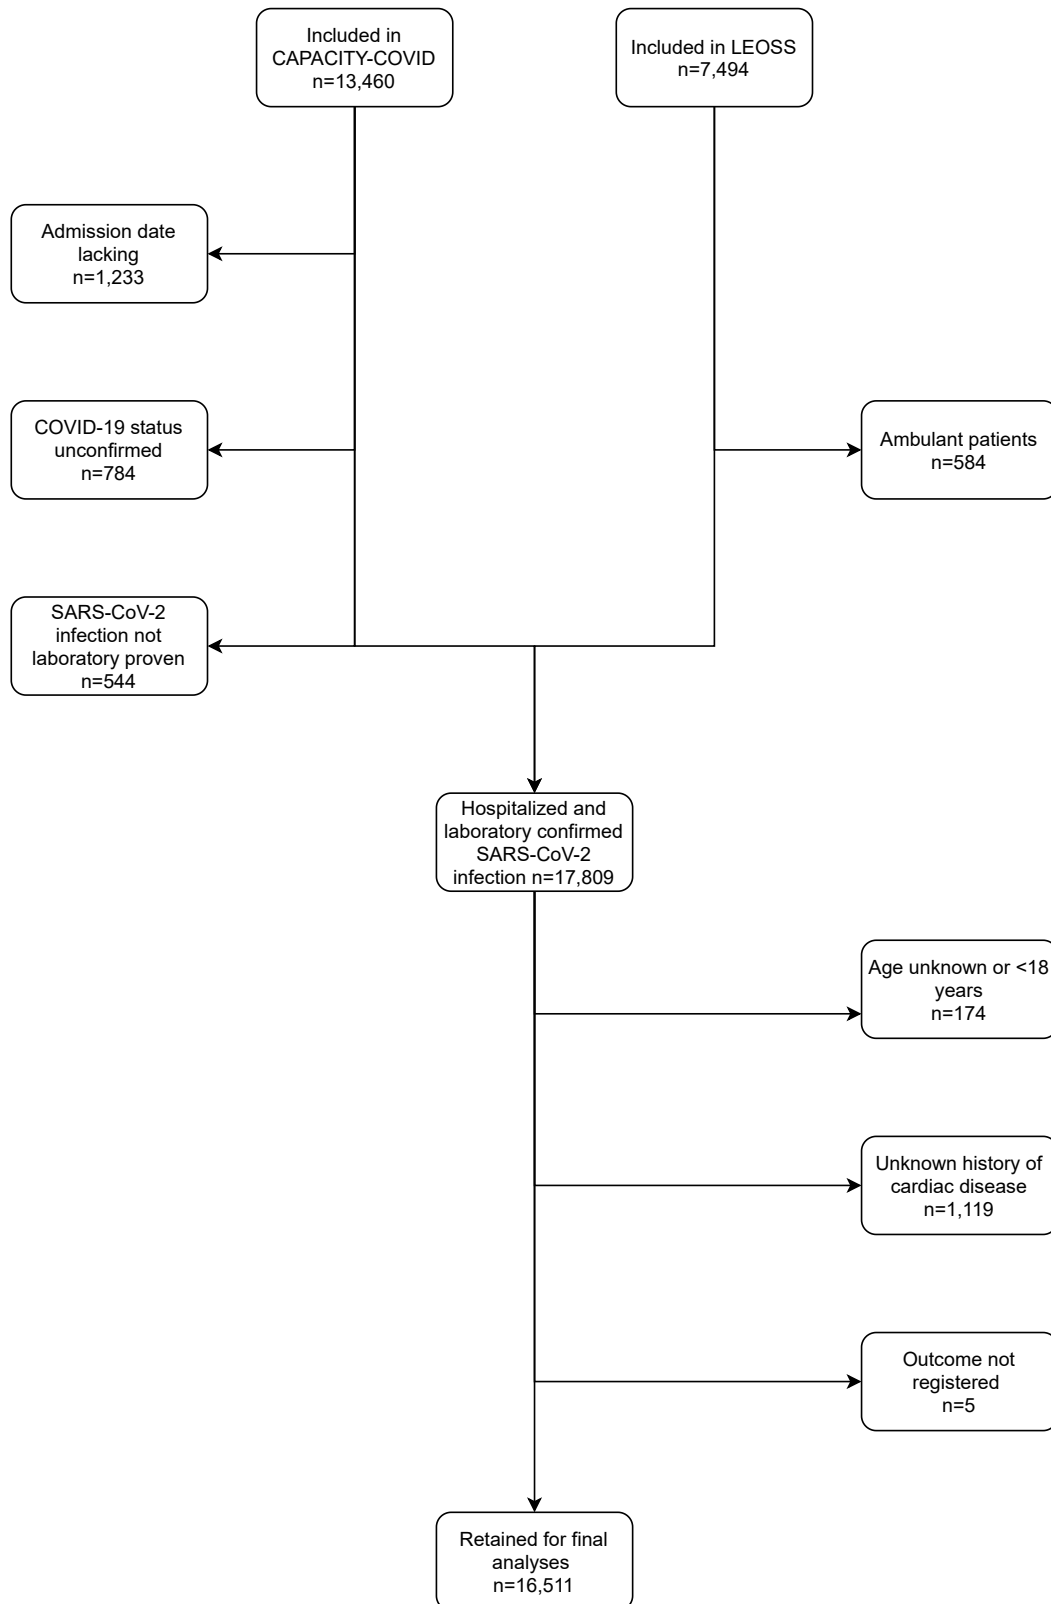

**Figure S1:** Selection of study population

| <b>Table S2: Baseline characteristics stratified by data source and age</b> |                |                       |                     |                  |                     |                |
|-----------------------------------------------------------------------------|----------------|-----------------------|---------------------|------------------|---------------------|----------------|
|                                                                             | <b>Overall</b> | <b>CAPACITY-COVID</b> |                     | <b>LEOSS</b>     |                     | <b>P-value</b> |
|                                                                             |                | <b>≤65 years</b>      | <b>&gt;65 years</b> | <b>≤65 years</b> | <b>&gt;65 years</b> |                |
| Total                                                                       | 16511          | 4303                  | 5501                | 3347             | 3360                |                |
| <b>Age, years (%)</b>                                                       |                |                       |                     |                  |                     | <0.001         |
| Median, [IQR]                                                               | NA             | 55 [46 – 60]          | 77 [72 – 84]        | NA               | NA                  |                |
| 18 – 25                                                                     | 239 (1.4)      | 94 (2.2)              | 0 (0.0)             | 145 (4.3)        | 0 (0.0)             |                |
| 26 – 35                                                                     | 704 (4.3)      | 303 (7.0)             | 0 (0.0)             | 401 (12.0)       | 0 (0.0)             |                |
| 36 – 45                                                                     | 1128 (6.8)     | 581 (13.5)            | 0 (0.0)             | 547 (16.3)       | 0 (0.0)             |                |
| 46 – 55                                                                     | 2299 (13.9)    | 1309 (30.4)           | 0 (0.0)             | 990 (29.6)       | 0 (0.0)             |                |
| 56 – 65                                                                     | 3280 (19.9)    | 2016 (46.9)           | 0 (0.0)             | 1264 (37.8)      | 0 (0.0)             |                |
| 66 – 75                                                                     | 3485 (21.1)    | 0 (0.0)               | 2290 (41.6)         | 0 (0.0)          | 1195 (35.6)         |                |
| 76 – 85                                                                     | 3720 (22.5)    | 0 (0.0)               | 2178 (39.6)         | 0 (0.0)          | 1542 (45.9)         |                |
| >85                                                                         | 1656 (10.0)    | 0 (0.0)               | 1033 (18.8)         | 0 (0.0)          | 623 (18.5)          |                |
| <b>Sex, female (%)</b>                                                      | 6627 (40.2)    | 1559 (36.3)           | 2222 (40.5)         | 1311 (39.2)      | 1535 (45.7)         | <0.001         |
| <b>Ethnicity</b>                                                            |                |                       |                     |                  |                     | <0.001         |
| Arab                                                                        | 496 (3.5)      | 345 (9.0)             | 151 (3.0)           | 0 (0.0)          | 0 (0.0)             |                |
| Asian                                                                       | 898 (6.3)      | 483 (12.6)            | 231 (4.6)           | 143 (5.5)        | 41 (1.4)            |                |
| Black                                                                       | 384 (2.7)      | 215 (5.6)             | 85 (1.7)            | 78 (3.0)         | 6 (0.2)             |                |
| Latin-American                                                              | 21 (0.1)       | 14 (0.4)              | 7 (0.1)             | 0 (0.0)          | 0 (0.0)             |                |
| White                                                                       | 12120 (84.5)   | 2481 (64.8)           | 4464 (88.2)         | 2358 (91.4)      | 2817 (98.4)         |                |
| Other                                                                       | 416 (2.9)      | 293 (7.6)             | 123 (2.4)           | 0 (0.0)          | 0 (0.0)             |                |
| <b>BMI (kg/m<sup>2</sup>)(%)</b>                                            |                |                       |                     |                  |                     | <0.001         |
| Mean, (+/- SD)                                                              | NA             | 29.5 (6.3)            | 27.2 (5.6)          | NA               | NA                  |                |
| Underweight (<18.5)                                                         | 239 (2.3)      | 22 (0.8)              | 118 (3.3)           | 36 (1.7)         | 63 (3.2)            |                |
| Normal weight (18.5 – 24.9)                                                 | 3091 (29.7)    | 601 (22.3)            | 1205 (33.3)         | 580 (27.6)       | 705 (35.3)          |                |
| Overweight (25.0 – 29.9)                                                    | 3854 (37.0)    | 1027 (38.1)           | 1365 (37.7)         | 753 (35.8)       | 709 (35.5)          |                |
| Obese (30.0 – 34.9)                                                         | 2069 (19.9)    | 619 (23.0)            | 643 (17.8)          | 450 (21.4)       | 357 (17.9)          |                |
| Morbidly obese (> 34.9)                                                     | 1157 (11.1)    | 424 (15.7)            | 288 (8.0)           | 283 (13.5)       | 162 (8.1)           |                |
| <b>Cardiovascular risk factors (%)</b>                                      |                |                       |                     |                  |                     |                |
| Diabetes                                                                    | 4031 (24.9)    | 886 (21.0)            | 1649 (30.4)         | 494 (15.0)       | 1002 (30.5)         | <0.001         |
| Hypertension                                                                | 7975 (49.5)    | 1310 (31.2)           | 3232 (60.3)         | 1089 (33.2)      | 2344 (71.5)         | <0.001         |
| Peripheral arterial disease                                                 | 654 (4.8)      | 49 (1.5)              | 284 (7.1)           | 53 (1.6)         | 268 (8.3)           | <0.001         |
| <b>Cardiac disease (%)</b>                                                  |                |                       |                     |                  |                     |                |
| Any history of cardiac disease                                              | 5198 (31.5)    | 654 (15.2)            | 2647 (48.1)         | 345 (10.3)       | 1552 (46.2)         | <0.001         |
| Arrhythmia/conduction disorder                                              | 2503 (15.3)    | 174 (4.0)             | 1277 (23.2)         | 113 (3.4)        | 939 (28.4)          | <0.001         |
| Atrial fibrillation/flutter                                                 | 2004 (12.3)    | 96 (2.2)              | 953 (17.3)          | 100 (3.0)        | 855 (26.1)          | <0.001         |
| Coronary artery disease                                                     | 2420 (14.8)    | 284 (6.6)             | 1090 (19.8)         | 225 (6.8)        | 821 (25.1)          | <0.001         |
| Myocardial infarction                                                       | 769 (4.8)      | 73 (1.7)              | 298 (5.6)           | 102 (3.1)        | 296 (9.1)           | <0.001         |
| Heart failure                                                               | 1314 (8.1)     | 86 (2.0)              | 630 (11.5)          | 84 (2.6)         | 514 (15.9)          | <0.001         |
| NYHA I/II                                                                   | 324 (2.0)      | 26 (0.6)              | 157 (2.9)           | 24 (0.7)         | 117 (3.5)           | <0.001         |
| NYHA III/IV                                                                 | 246 (1.5)      | 4 (0.1)               | 75 (1.4)            | 20 (0.6)         | 147 (4.4)           | <0.001         |
| Valvular heart disease                                                      | 579 (3.6)      | 53 (1.2)              | 368 (6.7)           | 18 (0.6)         | 140 (4.3)           | <0.001         |
| <b>Comorbidities (%)</b>                                                    |                |                       |                     |                  |                     |                |
| Chronic kidney disease                                                      | 2196 (13.5)    | 189 (4.4)             | 991 (18.2)          | 223 (6.8)        | 793 (24.2)          | <0.001         |
| COPD                                                                        | 1563 (9.6)     | 245 (5.8)             | 887 (16.4)          | 98 (3.0)         | 333 (10.2)          | <0.001         |
| <b>Use cardiovascular drugs (%)</b>                                         |                |                       |                     |                  |                     |                |
| ACE-inhibitors                                                              | 3021 (18.8)    | 491 (11.4)            | 1144 (20.8)         | 410 (13.1)       | 976 (31.2)          | <0.001         |
| Aldosterone antagonist                                                      | 563 (3.5)      | 53 (1.2)              | 219 (4.0)           | 63 (1.9)         | 228 (7.1)           | <0.001         |
| Anti-platelet                                                               | 3044 (18.7)    | 417 (9.7)             | 1419 (25.8)         | 274 (8.4)        | 934 (29.1)          | <0.001         |
| Angiotensin receptor blocker                                                | 2159 (13.5)    | 316 (7.4)             | 745 (13.6)          | 343 (11.0)       | 755 (24.4)          | <0.001         |
| Calcium-blocker                                                             | 2769 (17.0)    | 503 (11.7)            | 1108 (20.2)         | 365 (11.2)       | 793 (24.7)          | <0.001         |
| Diuretic                                                                    | 3338 (20.5)    | 395 (9.2)             | 1515 (27.6)         | 291 (9.0)        | 1137 (35.4)         | <0.001         |
| Insulin                                                                     | 1204 (7.4)     | 278 (6.5)             | 431 (7.8)           | 146 (4.4)        | 349 (10.6)          | <0.001         |
| Lipid-lowering                                                              | 4789 (30.5)    | 911 (21.2)            | 2459 (44.7)         | 363 (12.3)       | 1056 (35.6)         | <0.001         |
| Oral anti-diabetic                                                          | 2139 (13.0)    | 523 (12.2)            | 973 (17.7)          | 235 (7.0)        | 408 (12.1)          | <0.001         |

ACE = Angiotensin Converting Enzyme; BMI = Body Mass Index; COPD = Chronic Obstructive Pulmonary Disease; IQR = Interquartile Range; NYHA = New York Heart Association; SD = Standard Deviation



| <b>Table S3: Detailed specification of pre-existing cardiac disease in CAPACITY COVID</b> |                |                  |                     |                |
|-------------------------------------------------------------------------------------------|----------------|------------------|---------------------|----------------|
|                                                                                           | <b>Overall</b> | <b>≤65 years</b> | <b>&gt;65 years</b> | <b>P-value</b> |
| Total                                                                                     | 9804           | 4303             | 5501                |                |
| <b>Arrhythmia/conduction disorder</b>                                                     |                |                  |                     |                |
| Any                                                                                       | 1451 (14.8)    | 174 (4.0)        | 1277 (23.2)         | <0.001         |
| Supraventricular tachycardia                                                              | 1179 (12.0)    | 130 (3.0)        | 1049 (19.1)         | <0.001         |
| Paroxysmal atrial fibrillation                                                            | 442 (4.5)      | 48 (1.1)         | 394 (7.2)           | <0.001         |
| Persistent atrial fibrillation                                                            | 183 (1.9)      | 14 (0.3)         | 169 (3.1)           | <0.001         |
| Permanent atrial fibrillation                                                             | 378 (3.9)      | 27 (0.6)         | 351 (6.4)           | <0.001         |
| Atrial flutter                                                                            | 989 (10.1)     | 89 (2.1)         | 900 (16.4)          | <0.001         |
| Atrial tachycardia                                                                        | 87 (0.9)       | 7 (0.2)          | 80 (1.5)            | <0.001         |
| AVNRT                                                                                     | 23 (0.2)       | 10 (0.2)         | 13 (0.2)            | 1.00           |
| AVRT                                                                                      | 2 (0.0)        | 1 (0.0)          | 1 (0.0)             | 1.00           |
| Unspecified                                                                               | 91 (0.9)       | 17 (0.4)         | 74 (1.3)            | <0.001         |
| Ventricular tachycardia (VT)                                                              | 66 (0.7)       | 19 (0.4)         | 47 (0.9)            | 0.018          |
| Non-sustained VT                                                                          | 24 (0.2)       | 8 (0.2)          | 16 (0.3)            | 0.402          |
| Sustained VT                                                                              | 19 (0.2)       | 4 (0.1)          | 15 (0.3)            | 0.076          |
| Ventricular fibrillation                                                                  | 26 (0.3)       | 8 (0.2)          | 18 (0.3)            | 0.249          |
| Conduction disorder                                                                       | 154 (1.6)      | 13 (0.3)         | 141 (2.6)           | <0.001         |
| First-degree AV-block                                                                     | 34 (0.3)       | 3 (0.1)          | 31 (0.6)            | <0.001         |
| Second-degree AV-block                                                                    | 19 (0.2)       | 1 (0.0)          | 18 (0.3)            | 0.002          |
| Third-degree AV-block                                                                     | 31 (0.3)       | 0 (0.0)          | 31 (0.6)            | <0.001         |
| Left bundle branch block                                                                  | 32 (0.3)       | 6 (0.1)          | 26 (0.5)            | 0.007          |
| Right bundle branch block                                                                 | 28 (0.3)       | 0 (0.0)          | 28 (0.5)            | <0.001         |
| Long-QT                                                                                   | 7 (0.1)        | 1 (0.0)          | 6 (0.1)             | 0.231          |
| Unspecified                                                                               | 14 (0.1)       | 3 (0.1)          | 11 (0.2)            | 0.154          |
| Sinus node dysfunction                                                                    | 52 (0.5)       | 5 (0.1)          | 47 (0.9)            | <0.001         |
| <b>Congenital heart disease</b>                                                           | 37 (0.4)       | 18 (0.4)         | 19 (0.3)            | 0.676          |
| <b>Coronary artery disease</b>                                                            | 1374 (14.0)    | 284 (6.6)        | 1090 (19.8)         | <0.001         |
| Stable angina                                                                             | 385 (4.0)      | 75 (1.8)         | 310 (5.8)           | <0.001         |
| Unstable angina                                                                           | 197 (2.0)      | 44 (1.0)         | 153 (2.9)           | <0.001         |
| NSTEMI                                                                                    | 371 (3.9)      | 73 (1.7)         | 298 (5.6)           | <0.001         |
| STEMI                                                                                     | 361 (3.7)      | 77 (1.8)         | 284 (5.3)           | <0.001         |
| <b>Intervention coronary artery disease</b>                                               |                |                  |                     |                |
| PCI                                                                                       | 637 (6.6)      | 142 (3.3)        | 495 (9.1)           | <0.001         |
| CABG                                                                                      | 366 (3.8)      | 58 (1.4)         | 308 (5.7)           | <0.001         |
| <b>Heart failure</b>                                                                      | 716 (7.3)      | 86 (2.0)         | 630 (11.5)          | <0.001         |
| NYHA I/II                                                                                 | 183 (1.9)      | 26 (0.6)         | 157 (2.9)           | <0.001         |
| NYHA III/IV                                                                               | 79 (0.8)       | 4 (0.1)          | 75 (1.4)            | <0.001         |
| <b>Cardiomyopathy</b>                                                                     |                |                  |                     |                |
| Arrhythmogenic                                                                            | 36 (0.4)       | 4 (0.1)          | 32 (0.6)            | <0.001         |
| Dilated                                                                                   | 136 (1.4)      | 12 (0.3)         | 124 (2.3)           | <0.001         |
| Hypertensive                                                                              | 55 (0.6)       | 8 (0.2)          | 47 (0.9)            | <0.001         |
| Hypertrophic                                                                              | 21 (0.2)       | 6 (0.1)          | 15 (0.3)            | 0.224          |
| Ischemic                                                                                  | 118 (1.2)      | 20 (0.5)         | 98 (1.8)            | <0.001         |
| Myocarditis                                                                               | 6 (0.1)        | 3 (0.1)          | 3 (0.1)             | 1.000          |
| Non-compaction                                                                            | 4 (0.0)        | 0 (0.0)          | 4 (0.1)             | 0.203          |
| Restrictive                                                                               | 4 (0.0)        | 1 (0.0)          | 3 (0.1)             | 0.790          |
| Toxic                                                                                     | 4 (0.0)        | 2 (0.0)          | 2 (0.0)             | 1.000          |
| Valvular                                                                                  | 58 (0.6)       | 6 (0.1)          | 52 (1.0)            | <0.001         |
| Unspecified                                                                               | 217 (2.2)      | 15 (0.3)         | 202 (3.7)           | <0.001         |
| <b>Valvular heart disease</b>                                                             | 421 (4.3)      | 53 (1.2)         | 368 (6.7)           | <0.001         |
| Aortic stenosis                                                                           | 231 (2.4)      | 25 (0.6)         | 206 (3.7)           | <0.001         |
| Aortic regurgitation                                                                      | 66 (0.7)       | 13 (0.3)         | 53 (1.0)            | <0.001         |
| Mitral stenosis                                                                           | 26 (0.3)       | 3 (0.1)          | 23 (0.4)            | 0.002          |
| Mitral regurgitation                                                                      | 130 (1.3)      | 16 (0.4)         | 114 (2.1)           | <0.001         |
| Pulmonary regurgitation                                                                   | 3 (0.0)        | 1 (0.0)          | 2 (0.0)             | 1.000          |
| Tricuspid regurgitation                                                                   | 51 (0.5)       | 3 (0.1)          | 48 (0.9)            | <0.001         |
| <b>Interventions valvular heart disease</b>                                               |                |                  |                     |                |
| Intervention performed                                                                    | 174 (1.8)      | 26 (0.6)         | 148 (2.7)           | <0.001         |
| Intervention planned                                                                      | 11 (0.1)       | 3 (0.1)          | 8 (0.1)             | 0.420          |

AVNRT = AV-nodal Reentrant Tachycardia; AVRT = Atrioventricular Reentrant Tachycardia; AV = Atrioventricular; CABG = Coronary Artery Bypass Surgery; NSTEMI = Non-ST-Elevation Myocardial Infarction; NYHA = New York Heart Association; PCI = Percutaneous Coronary Intervention; STEMI = ST-Elevation Myocardial Infarction; VT = Ventricular Tachycardia

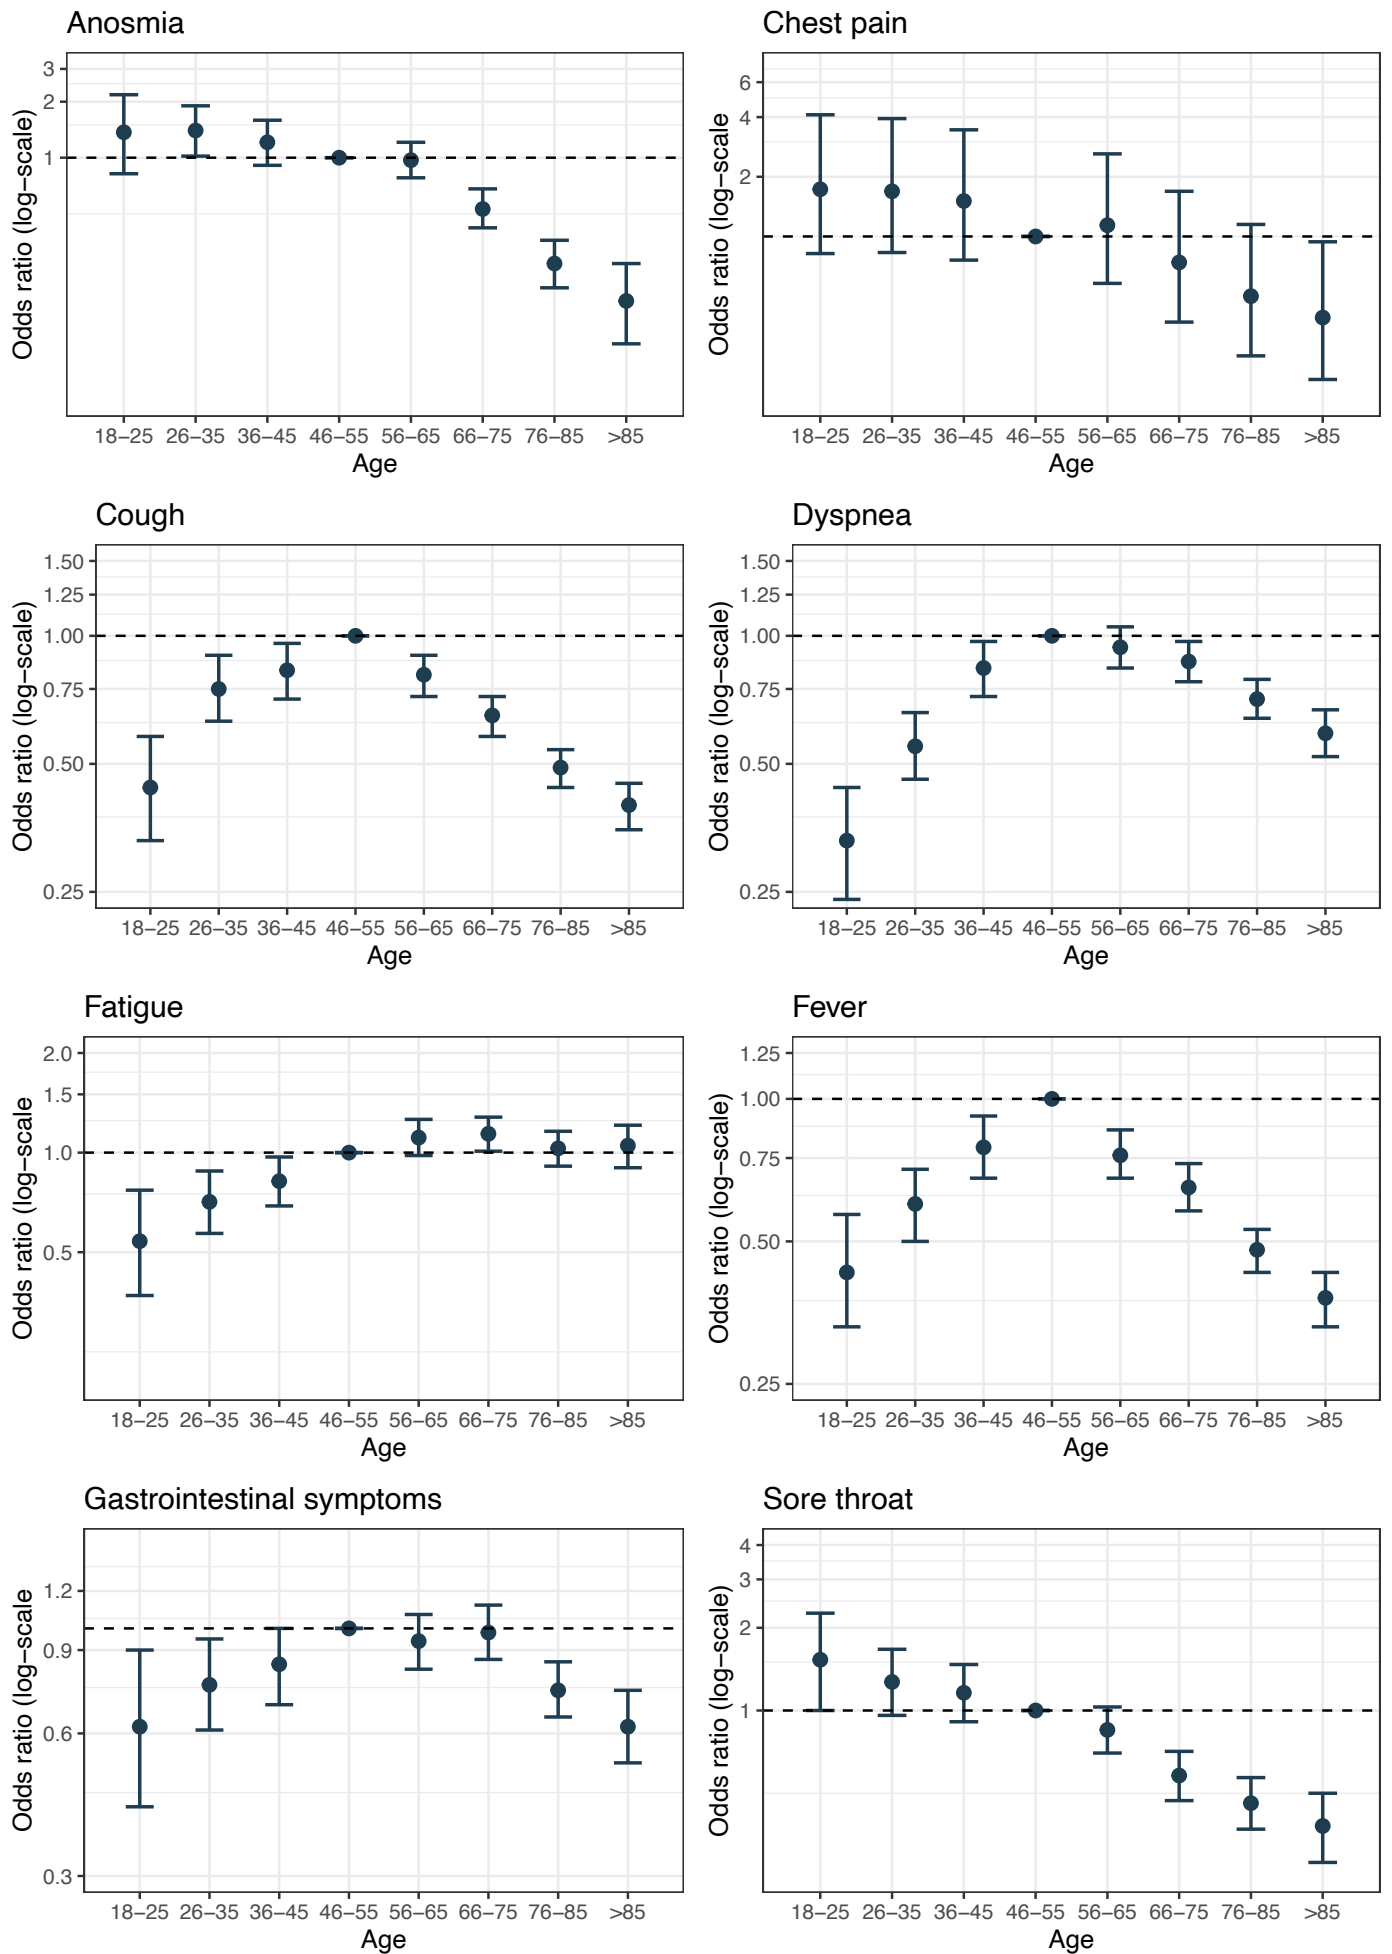

Figure S2: Complaints at presentation stratified by age.

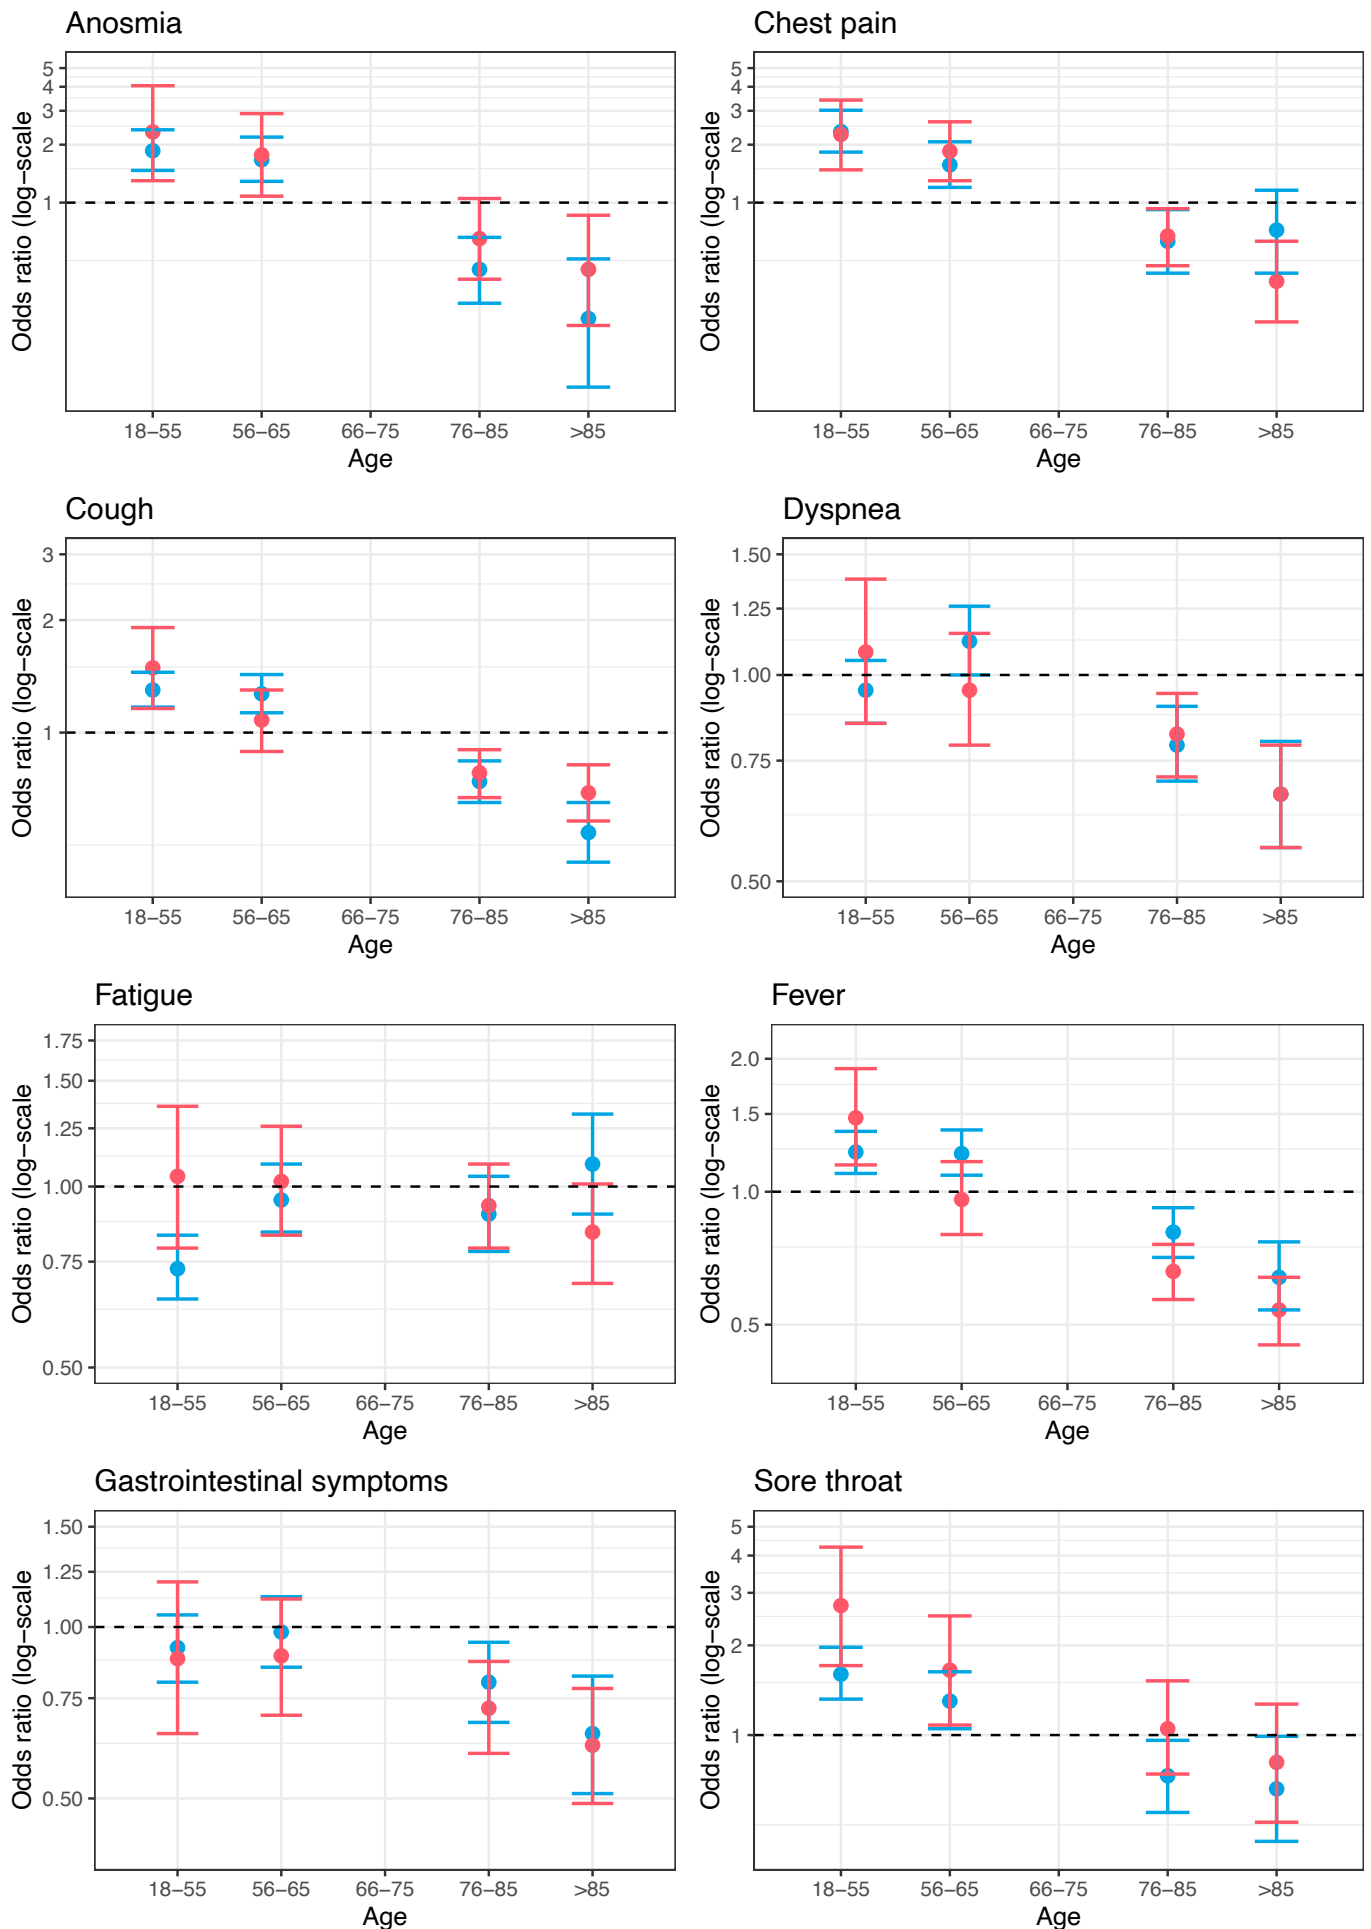

**Figure S3:** Complaints at presentation stratified by age and prior history of cardiac disease. Red = patients with pre-existing cardiac disease, blue = patients without pre-existing cardiac disease.

| <b>Table S4: Complaints, vitals and laboratory values at admission stratified by data source and age</b> |                |                       |                     |                  |                     |                |
|----------------------------------------------------------------------------------------------------------|----------------|-----------------------|---------------------|------------------|---------------------|----------------|
|                                                                                                          | <b>Overall</b> | <b>CAPACITY-COVID</b> |                     | <b>LEOSS</b>     |                     | <b>P-value</b> |
|                                                                                                          |                | <b>≤65 years</b>      | <b>&gt;65 years</b> | <b>≤65 years</b> | <b>&gt;65 years</b> |                |
| Total                                                                                                    | 16511          | 4303                  | 5501                | 3347             | 3360                |                |
| <b>Admission</b>                                                                                         |                |                       |                     |                  |                     |                |
| Onset of symptoms to admission, days, median, [IQR]                                                      | NA             | 7 [3 – 10]            | 5 [1 – 8]           | NA               | NA                  | NA             |
| <b>Complaints at admission (%)</b>                                                                       |                |                       |                     |                  |                     |                |
| Anosmia                                                                                                  | 723 (4.6)      | 297 (7.4)             | 153 (2.9)           | 217 (6.7)        | 56 (1.7)            | <0.001         |
| Chest pain                                                                                               | NA             | 535 (13.3)            | 318 (6.1)           | NA               | NA                  | NA             |
| Cough                                                                                                    | 8158 (51.8)    | 2713 (67.5)           | 2867 (55.1)         | 1510 (46.5)      | 1068 (32.7)         | <0.001         |
| Dyspnea                                                                                                  | 7798 (49.8)    | 2694 (67.0)           | 3027 (58.2)         | 1056 (33.0)      | 1021 (31.7)         | <0.001         |
| Fatigue                                                                                                  | 4214 (26.8)    | 1399 (34.8)           | 1790 (34.4)         | 471 (14.5)       | 554 (16.9)          | <0.001         |
| Fever                                                                                                    | 8638 (54.9)    | 2914 (72.5)           | 3104 (59.6)         | 1491 (45.9)      | 1129 (34.5)         | <0.001         |
| Gastrointestinal symptoms                                                                                | 3030 (19.2)    | 1120 (27.9)           | 1269 (24.4)         | 352 (10.8)       | 289 (8.8)           | <0.001         |
| (Pre) syncope                                                                                            | NA             | 108 (2.7)             | 205 (3.9)           | NA               | NA                  | NA             |
| Orthopnea                                                                                                | NA             | 68 (1.7)              | 66 (1.3)            | NA               | NA                  | NA             |
| Palpitations                                                                                             | 162 (1.0)      | 42 (1.0)              | 62 (1.2)            | 24 (0.7)         | 34 (1.0)            | 0.258          |
| Peripheral edema                                                                                         | NA             | 13 (0.3)              | 42 (0.8)            | NA               | NA                  | NA             |
| Sore throat                                                                                              | 1108 (7.0)     | 421 (10.5)            | 317 (6.1)           | 270 (8.3)        | 100 (3.1)           | <0.001         |
| <b>Vitals at admission (%)</b>                                                                           |                |                       |                     |                  |                     |                |
| Temperature (°C)                                                                                         |                |                       |                     |                  |                     | <0.001         |
| Mean, (SD)                                                                                               | NA             | 37.7 (1.1)            | 37.5 (1.1)          | NA               | NA                  |                |
| < 35.1                                                                                                   | 72 (0.6)       | 13 (0.3)              | 42 (0.9)            | 4 (0.3)          | 13 (0.8)            |                |
| 35.1 – 37.2                                                                                              | 4898 (41.7)    | 1383 (36.3)           | 2049 (43.4)         | 665 (42.5)       | 801 (48.9)          |                |
| 37.3 – 37.9                                                                                              | 2546 (21.7)    | 877 (23.0)            | 1029 (21.8)         | 313 (20.0)       | 327 (20.0)          |                |
| 38.0 – 38.9                                                                                              | 2920 (24.9)    | 1031 (27.0)           | 1141 (24.2)         | 390 (24.9)       | 358 (21.9)          |                |
| 39.0 – 39.9                                                                                              | 1139 (9.7)     | 451 (11.8)            | 402 (8.5)           | 164 (10.5)       | 122 (7.4)           |                |
| > 39.9                                                                                                   | 158 (1.3)      | 59 (1.5)              | 54 (1.1)            | 28 (1.8)         | 17 (1.0)            |                |
| Respiratory rate (breaths/min)                                                                           |                |                       |                     |                  |                     | <0.001         |
| Median, [IQR]                                                                                            | NA             | 21 [18 – 26]          | 20 [18 – 25]        | NA               | NA                  |                |
| < 16                                                                                                     | 1168 (10.8)    | 267 (7.2)             | 391 (8.5)           | 246 (20.4)       | 264 (20.0)          |                |
| 16 – 21                                                                                                  | 4914 (45.4)    | 1646 (44.5)           | 2059 (44.9)         | 596 (49.5)       | 613 (46.4)          |                |
| 22 – 29                                                                                                  | 3219 (29.8)    | 1179 (31.9)           | 1476 (32.2)         | 249 (20.7)       | 315 (23.9)          |                |
| > 29                                                                                                     | 1512 (14.0)    | 609 (16.5)            | 661 (14.4)          | 114 (9.5)        | 128 (9.7)           |                |
| Heart rate (beats/min)                                                                                   |                |                       |                     |                  |                     | <0.001         |
| Mean, (SD)                                                                                               | NA             | 93 (18)               | 88 (20)             | NA               | NA                  |                |
| <45                                                                                                      | 51 (0.4)       | 10 (0.3)              | 27 (0.6)            | 7 (0.4)          | 7 (0.4)             |                |
| 45 – 59                                                                                                  | 293 (2.5)      | 48 (1.3)              | 168 (3.5)           | 30 (1.9)         | 47 (2.9)            |                |
| 60 – 89                                                                                                  | 6037 (51.2)    | 1601 (41.7)           | 2548 (53.7)         | 858 (55.1)       | 1030 (62.5)         |                |
| 90 – 119                                                                                                 | 4627 (39.3)    | 1881 (49.0)           | 1671 (35.2)         | 593 (38.1)       | 482 (29.2)          |                |
| >119                                                                                                     | 775 (6.6)      | 297 (7.7)             | 327 (6.9)           | 68 (4.4)         | 83 (5.0)            |                |
| Systolic blood pressure (mmHg)                                                                           |                |                       |                     |                  |                     | <0.001         |
| Mean, (SD)                                                                                               | NA             | 131 (21)              | 134 (24)            | NA               | NA                  |                |
| <80                                                                                                      | 79 (0.7)       | 14 (0.4)              | 37 (0.8)            | 8 (0.5)          | 20 (1.2)            |                |
| 80 – 99                                                                                                  | 566 (4.8)      | 166 (4.3)             | 259 (5.5)           | 59 (3.8)         | 82 (4.9)            |                |
| 100 – 119                                                                                                | 2606 (22.1)    | 920 (24.1)            | 1028 (21.7)         | 357 (22.9)       | 301 (18.2)          |                |
| 120 – 139                                                                                                | 4291 (36.5)    | 1564 (40.9)           | 1538 (32.5)         | 653 (41.9)       | 536 (32.3)          |                |
| 140 – 179                                                                                                | 3827 (32.5)    | 1077 (28.2)           | 1670 (35.3)         | 450 (28.9)       | 630 (38.0)          |                |
| >179                                                                                                     | 403 (3.4)      | 80 (2.1)              | 205 (4.3)           | 30 (1.9)         | 88 (5.3)            |                |
| Diastolic blood pressure (mmHg)                                                                          |                |                       |                     |                  |                     | <0.001         |
| Mean, (SD)                                                                                               | NA             | 79 (14)               | 75 (15)             | NA               | NA                  |                |
| < 40                                                                                                     | 44 (0.4)       | 11 (0.3)              | 17 (0.4)            | 3 (0.2)          | 13 (0.8)            |                |
| 40 – 59                                                                                                  | 1218 (10.4)    | 278 (7.3)             | 649 (13.7)          | 84 (5.4)         | 207 (12.6)          |                |
| 60 – 89                                                                                                  | 8452 (71.9)    | 2773 (72.6)           | 3352 (70.8)         | 1174 (75.6)      | 1153 (69.9)         |                |
| 90 – 109                                                                                                 | 1823 (15.5)    | 696 (18.2)            | 615 (13.0)          | 266 (17.1)       | 246 (14.9)          |                |
| > 109                                                                                                    | 216 (1.8)      | 61 (1.6)              | 100 (2.1)           | 25 (1.6)         | 30 (1.8)            |                |
| Oxygen saturation (%)                                                                                    |                |                       |                     |                  |                     | <0.001         |
| Median, [IQR]                                                                                            | NA             | 95 [93 – 97]          | 95 [92 – 97]        | NA               | NA                  |                |
| < 60                                                                                                     | 67 (0.6)       | 21 (0.5)              | 14 (0.3)            | 12 (0.8)         | 20 (1.2)            |                |
| 60 – 69                                                                                                  | 57 (0.5)       | 19 (0.5)              | 15 (0.3)            | 7 (0.5)          | 16 (1.0)            |                |

|                                               |             |               |               |             |             |        |
|-----------------------------------------------|-------------|---------------|---------------|-------------|-------------|--------|
| 70 – 79                                       | 206 (1.8)   | 62 (1.6)      | 67 (1.4)      | 23 (1.5)    | 54 (3.3)    |        |
| 80 – 89                                       | 1313 (11.2) | 347 (9.1)     | 532 (11.2)    | 141 (9.2)   | 293 (17.9)  |        |
| 90 – 95                                       | 4768 (40.6) | 1492 (39.0)   | 2050 (43.3)   | 540 (35.1)  | 686 (41.9)  |        |
| 96 – 100                                      | 5330 (45.4) | 1887 (49.3)   | 2060 (43.5)   | 816 (53.0)  | 567 (34.7)  |        |
| <b>Laboratory values at admission (%)</b>     |             |               |               |             |             |        |
| CRP (mg/L)                                    |             |               |               |             |             | <0.001 |
| Median, [IQR]                                 | NA          | 82 [36 – 157] | 84 [39 – 148] | NA          | NA          |        |
| < 3                                           | 540 (4.7)   | 81 (2.2)      | 62 (1.4)      | 251 (15.6)  | 146 (8.6)   |        |
| 3 – 29                                        | 2664 (23.2) | 680 (18.7)    | 803 (17.8)    | 641 (39.9)  | 540 (31.7)  |        |
| 30 – 69                                       | 2605 (22.7) | 844 (23.2)    | 1078 (23.8)   | 294 (18.3)  | 389 (22.8)  |        |
| 70 – 119                                      | 2225 (19.4) | 738 (20.3)    | 1005 (22.2)   | 186 (11.6)  | 296 (17.4)  |        |
| 120 – 179                                     | 1657 (14.4) | 562 (15.5)    | 762 (16.9)    | 148 (9.2)   | 185 (10.9)  |        |
| 180 – 249                                     | 965 (8.4)   | 375 (10.3)    | 451 (10.0)    | 50 (3.1)    | 89 (5.2)    |        |
| > 249                                         | 812 (7.1)   | 356 (9.8)     | 360 (8.0)     | 37 (2.3)    | 59 (3.5)    |        |
| White blood cell count (x 10 <sup>9</sup> /L) |             |               |               |             |             | <0.001 |
| Mean, (SD)                                    | NA          | 8.4 (10.1)    | 8.5 (8.1)     | NA          | NA          |        |
| < 1.0                                         | 33 (0.3)    | 12 (0.3)      | 12 (0.3)      | 7 (0.4)     | 2 (0.1)     |        |
| 1.0 – 3.9                                     | 1327 (11.5) | 407 (11.1)    | 430 (9.6)     | 248 (15.1)  | 242 (14.1)  |        |
| 4.0 – 7.9                                     | 6110 (53.0) | 1924 (52.3)   | 2327 (51.9)   | 961 (58.5)  | 898 (52.2)  |        |
| 8.0 – 11.9                                    | 2773 (24.1) | 936 (25.4)    | 1169 (26.1)   | 308 (18.8)  | 360 (20.9)  |        |
| 12.0 – 15.9                                   | 935 (8.1)   | 306 (8.3)     | 417 (9.3)     | 79 (4.8)    | 133 (7.7)   |        |
| 16.0 – 19.9                                   | 288 (2.5)   | 93 (2.5)      | 132 (2.9)     | 17 (1.0)    | 46 (2.7)    |        |
| > 20                                          | 60 (0.5)    | 0 (0.0)       | 0 (0.0)       | 22 (1.3)    | 38 (2.2)    |        |
| Lymphocyte count (x 10 <sup>9</sup> /L)       |             |               |               |             |             | <0.001 |
| Mean, (SD)                                    | NA          | 1.13 (0.83)   | 1.01 (0.96)   | NA          | NA          |        |
| < 0.1                                         | 70 (0.7)    | 9 (0.3)       | 17 (0.4)      | 22 (1.8)    | 22 (1.6)    |        |
| 0.10 – 0.29                                   | 333 (3.5)   | 46 (1.5)      | 155 (4.0)     | 43 (3.4)    | 89 (6.4)    |        |
| 0.30 – 0.49                                   | 931 (9.7)   | 190 (6.2)     | 502 (12.8)    | 82 (6.5)    | 157 (11.3)  |        |
| 0.50 – 0.79                                   | 2447 (25.5) | 708 (23.2)    | 1124 (28.7)   | 239 (19.0)  | 376 (27.1)  |        |
| 0.80 – 1.49                                   | 4175 (43.4) | 1530 (50.0)   | 1573 (40.2)   | 546 (43.4)  | 526 (37.9)  |        |
| 1.50 – 2.99                                   | 1480 (15.4) | 524 (17.1)    | 472 (12.1)    | 290 (23.1)  | 194 (14.0)  |        |
| > 3.0                                         | 176 (1.8)   | 50 (1.6)      | 68 (1.7)      | 35 (2.8)    | 23 (1.7)    |        |
| Hemoglobin (mmol/L)                           |             |               |               |             |             | <0.001 |
| Mean, (SD)                                    | NA          | 8.33 (1.27)   | 7.97 (1.27)   | NA          | NA          |        |
| < 3.73                                        | 31 (0.3)    | 5 (0.1)       | 10 (0.2)      | 4 (0.2)     | 12 (0.7)    |        |
| 3.73 – 4.90                                   | 180 (1.6)   | 46 (1.2)      | 41 (0.9)      | 29 (1.8)    | 64 (3.8)    |        |
| 4.91 – 6.15                                   | 764 (6.6)   | 178 (4.8)     | 333 (7.4)     | 90 (5.5)    | 163 (9.6)   |        |
| 6.16 – 7.39                                   | 2101 (18.2) | 509 (13.8)    | 971 (21.4)    | 250 (15.3)  | 371 (21.8)  |        |
| 7.4 – 9.25                                    | 6469 (56.0) | 2079 (56.3)   | 2520 (55.7)   | 941 (57.7)  | 929 (54.5)  |        |
| >= 9.25                                       | 2010 (17.4) | 875 (23.7)    | 653 (14.4)    | 317 (19.4)  | 165 (9.7)   |        |
| Platelets (x 10 <sup>9</sup> /L)              |             |               |               |             |             | <0.001 |
| Mean, (SD)                                    | NA          | 234 (104)     | 221 (102)     | NA          | NA          |        |
| < 10                                          | 25 (0.2)    | 4 (0.1)       | 8 (0.2)       | 6 (0.4)     | 7 (0.4)     |        |
| 10 – 49                                       | 98 (0.9)    | 19 (0.5)      | 27 (0.6)      | 28 (1.8)    | 24 (1.4)    |        |
| 50 – 119                                      | 931 (8.4)   | 201 (5.7)     | 407 (9.5)     | 123 (7.7)   | 200 (12.0)  |        |
| 120 – 449                                     | 9681 (87.2) | 3177 (89.5)   | 3695 (86.4)   | 1411 (88.3) | 1398 (83.8) |        |
| 450 – 799                                     | 350 (3.2)   | 145 (4.1)     | 135 (3.2)     | 30 (1.9)    | 40 (2.4)    |        |
| 800 – 1199                                    | 11 (0.1)    | 5 (0.1)       | 6 (0.1)       | 0 (0.0)     | 0 (0.0)     |        |
| Creatinine (µmol/L), Mean, (SD)               | NA          | 98 (107)      | 116 (93)      | NA          | NA          | NA     |

CRP = C-Reactive Protein; IQR = Interquartile Range; SD = Standard Deviation

| <b>Table S5: Baseline characteristics stratified by admission to a critical care unit</b> |                |             |                      |                |
|-------------------------------------------------------------------------------------------|----------------|-------------|----------------------|----------------|
|                                                                                           | <b>Overall</b> | <b>Ward</b> | <b>Critical care</b> | <b>P-value</b> |
| Total                                                                                     | 16511          | 10287       | 3916                 |                |
| <b>Age, years (%)</b>                                                                     |                |             |                      | <0.001         |
| 18 – 25                                                                                   | 239 (1.4)      | 135 (1.3)   | 36 (0.9)             |                |
| 26 – 35                                                                                   | 704 (4.3)      | 443 (4.3)   | 90 (2.3)             |                |
| 36 – 45                                                                                   | 1128 (6.8)     | 657 (6.4)   | 254 (6.5)            |                |
| 46 – 55                                                                                   | 2299 (13.9)    | 1328 (12.9) | 655 (16.7)           |                |
| 56 – 65                                                                                   | 3280 (19.9)    | 1792 (17.4) | 1089 (27.8)          |                |
| 66 – 75                                                                                   | 3485 (21.1)    | 2005 (19.5) | 1112 (28.4)          |                |
| 76 – 85                                                                                   | 3720 (22.5)    | 2601 (25.3) | 598 (15.3)           |                |
| >85                                                                                       | 1656 (10.0)    | 1326 (12.9) | 82 (2.1)             |                |
| <b>Sex, female (%)</b>                                                                    | 6627 (40.2)    | 4438 (43.2) | 1112 (28.4)          | <0.001         |
| <b>Ethnicity</b>                                                                          |                |             |                      | <0.001         |
| Arab                                                                                      | 496 (3.5)      | 335 (3.6)   | 161 (5.0)            |                |
| Asian                                                                                     | 898 (6.3)      | 588 (6.3)   | 257 (7.9)            |                |
| Black                                                                                     | 384 (2.7)      | 253 (2.7)   | 92 (2.8)             |                |
| Latin-American                                                                            | 21 (0.1)       | 14 (0.2)    | 7 (0.2)              |                |
| White                                                                                     | 12120 (84.5)   | 7838 (84.2) | 2586 (80.0)          |                |
| Other                                                                                     | 416 (2.9)      | 286 (3.1)   | 130 (4.0)            |                |
| <b>BMI (kg/m<sup>2</sup>)</b>                                                             |                |             |                      | <0.001         |
| Underweight (<18.5)                                                                       | 239 (2.3)      | 169 (2.7)   | 32 (1.1)             |                |
| Normal weight (18.5 – 24.9)                                                               | 3091 (29.7)    | 2044 (32.8) | 642 (22.3)           |                |
| Overweight (25.0 – 29.9)                                                                  | 3854 (37.0)    | 2239 (35.9) | 1163 (40.4)          |                |
| Obese (30.0 – 34.9)                                                                       | 2069 (19.9)    | 1162 (18.6) | 641 (22.3)           |                |
| Morbidly obese (> 34.9)                                                                   | 1157 (11.1)    | 620 (9.9)   | 398 (13.8)           |                |
| <b>Cardiovascular risk factors</b>                                                        |                |             |                      |                |
| Diabetes                                                                                  | 4031 (24.9)    | 2541 (25.1) | 1022 (26.8)          | 0.039          |
| Hypertension                                                                              | 7975 (49.5)    | 4923 (49.0) | 1888 (49.8)          | 0.422          |
| Peripheral arterial disease                                                               | 654 (4.8)      | 405 (4.9)   | 149 (4.5)            | 0.426          |
| <b>Cardiac disease</b>                                                                    |                |             |                      |                |
| Any history of cardiac disease                                                            | 5198 (31.5)    | 3519 (34.2) | 1036 (26.5)          | <0.001         |
| Arrhythmia/conduction disorder                                                            | 2503 (15.3)    | 1695 (16.5) | 452 (11.7)           | <0.001         |
| Atrial fibrillation/flutter                                                               | 2004 (12.3)    | 1309 (12.8) | 369 (9.6)            | <0.001         |
| Coronary artery disease                                                                   | 2420 (14.8)    | 1504 (14.7) | 566 (14.6)           | 0.958          |
| Myocardial infarction                                                                     | 769 (4.8)      | 463 (4.6)   | 171 (4.5)            | 0.801          |
| Heart failure                                                                             | 1314 (8.1)     | 876 (8.6)   | 231 (6.0)            | <0.001         |
| NYHA I/II                                                                                 | 324 (2.0)      | 208 (2.0)   | 46 (1.2)             | 0.001          |
| NYHA III/IV                                                                               | 246 (1.5)      | 139 (1.4)   | 58 (1.5)             | 0.609          |
| Valvular heart disease                                                                    | 579 (3.6)      | 442 (4.3)   | 82 (2.1)             | <0.001         |
| <b>Comorbidities</b>                                                                      |                |             |                      |                |
| Chronic kidney disease                                                                    | 2196 (13.5)    | 1407 (13.9) | 440 (11.5)           | <0.001         |
| COPD                                                                                      | 1563 (9.6)     | 1096 (10.8) | 336 (8.8)            | <0.001         |
| <b>Use cardiovascular drugs</b>                                                           |                |             |                      |                |
| ACE-inhibitors                                                                            | 3021 (18.8)    | 1834 (18.0) | 697 (19.1)           | 0.152          |
| Aldosterone antagonist                                                                    | 563 (3.5)      | 356 (3.5)   | 103 (2.7)            | 0.036          |
| Anti-platelet                                                                             | 3044 (18.7)    | 1958 (19.1) | 661 (17.6)           | 0.042          |
| Angiotensin receptor blocker                                                              | 2159 (13.5)    | 1295 (12.7) | 515 (14.1)           | 0.033          |
| Calcium-blocker                                                                           | 2769 (17.0)    | 1629 (15.9) | 731 (19.5)           | <0.001         |
| Diuretic                                                                                  | 3338 (20.5)    | 2143 (20.9) | 686 (18.3)           | 0.001          |
| Insulin                                                                                   | 1204 (7.4)     | 730 (7.1)   | 315 (8.2)            | 0.034          |
| Lipid-lowering                                                                            | 4789 (30.5)    | 3300 (33.1) | 1015 (28.3)          | <0.001         |
| Oral anti-diabetic                                                                        | 2139 (13.0)    | 1386 (13.5) | 512 (13.1)           | 0.573          |

ACE = Angiotensin Converting Enzyme; BMI = Body Mass Index; COPD = Chronic Obstructive Pulmonary Disease; NYHA = New York Heart Association

| <b>Table S6: Complaints, vitals and laboratory values at admission stratified by admission to a critical care unit</b> |                |             |                      |                |
|------------------------------------------------------------------------------------------------------------------------|----------------|-------------|----------------------|----------------|
|                                                                                                                        | <b>Overall</b> | <b>Ward</b> | <b>Critical care</b> | <b>P-value</b> |
| Total                                                                                                                  | 16511          | 10287       | 3916                 |                |
| <b>Admission</b>                                                                                                       |                |             |                      |                |
| Onset of symptoms to admission, days, median, [IQR]                                                                    | 6 [2 – 9]      | 5 [1 – 9]   | 7 [3 – 9]            | <0.001         |
| <b>Complaints at admission</b>                                                                                         |                |             |                      |                |
| Anosmia                                                                                                                | 723 (4.6)      | 479 (4.9)   | 122 (3.3)            | <0.001         |
| Cough                                                                                                                  | 8158 (51.8)    | 5303 (54.5) | 1957 (52.2)          | 0.019          |
| Dyspnea                                                                                                                | 7798 (49.8)    | 4899 (50.7) | 2199 (59.1)          | <0.001         |
| Fatigue                                                                                                                | 4214 (26.8)    | 2946 (30.3) | 922 (24.6)           | <0.001         |
| Fever                                                                                                                  | 8638 (54.9)    | 5565 (57.2) | 2188 (58.4)          | 0.215          |
| Gastrointestinal symptoms                                                                                              | 3030 (19.2)    | 2124 (21.8) | 702 (18.7)           | <0.001         |
| Palpitations                                                                                                           | 162 (1.0)      | 106 (1.1)   | 40 (1.1)             | 0.986          |
| Sore throat                                                                                                            | 1108 (7.0)     | 734 (7.5)   | 233 (6.2)            | 0.008          |
| <b>Vitals at admission</b>                                                                                             |                |             |                      |                |
| Temperature (°C)                                                                                                       |                |             |                      | <0.001         |
| < 35.1                                                                                                                 | 72 (0.6)       | 45 (0.6)    | 22 (0.8)             |                |
| 35.1 – 37.2                                                                                                            | 4898 (41.7)    | 3417 (43.4) | 905 (33.7)           |                |
| 37.3 – 37.9                                                                                                            | 2546 (21.7)    | 1754 (22.3) | 554 (20.6)           |                |
| 38.0 – 38.9                                                                                                            | 2920 (24.9)    | 1856 (23.6) | 801 (29.8)           |                |
| 39.0 – 39.9                                                                                                            | 1139 (9.7)     | 721 (9.2)   | 338 (12.6)           |                |
| > 39.9                                                                                                                 | 158 (1.3)      | 79 (1.0)    | 65 (2.4)             |                |
| Respiratory rate (breaths/min)                                                                                         |                |             |                      | <0.001         |
| < 16                                                                                                                   | 1168 (10.8)    | 764 (10.3)  | 217 (8.6)            |                |
| 16 – 21                                                                                                                | 4914 (45.4)    | 3634 (49.1) | 767 (30.5)           |                |
| 22 – 29                                                                                                                | 3219 (29.8)    | 2171 (29.3) | 888 (35.4)           |                |
| > 29                                                                                                                   | 1512 (14.0)    | 832 (11.2)  | 639 (25.4)           |                |
| Heart rate (beats/min)                                                                                                 |                |             |                      | <0.001         |
| < 45                                                                                                                   | 51 (0.4)       | 33 (0.4)    | 11 (0.4)             |                |
| 45 – 59                                                                                                                | 293 (2.5)      | 214 (2.7)   | 63 (2.3)             |                |
| 60 – 89                                                                                                                | 6037 (51.2)    | 4106 (52.0) | 1223 (45.2)          |                |
| 90 – 119                                                                                                               | 4627 (39.3)    | 3067 (38.8) | 1162 (42.9)          |                |
| > 119                                                                                                                  | 775 (6.6)      | 480 (6.1)   | 248 (9.2)            |                |
| Systolic blood pressure (mmHg)                                                                                         |                |             |                      | 0.02           |
| < 80                                                                                                                   | 79 (0.7)       | 47 (0.6)    | 21 (0.8)             |                |
| 80 – 99                                                                                                                | 566 (4.8)      | 358 (4.5)   | 153 (5.7)            |                |
| 100 – 119                                                                                                              | 2606 (22.1)    | 1748 (22.1) | 622 (23.2)           |                |
| 120 – 139                                                                                                              | 4291 (36.5)    | 2918 (36.9) | 923 (34.4)           |                |
| 140 – 179                                                                                                              | 3827 (32.5)    | 2574 (32.6) | 860 (32.1)           |                |
| > 179                                                                                                                  | 403 (3.4)      | 258 (3.3)   | 103 (3.8)            |                |
| Diastolic blood pressure (mmHg)                                                                                        |                |             |                      | <0.001         |
| < 40                                                                                                                   | 44 (0.4)       | 19 (0.2)    | 23 (0.9)             |                |
| 40 – 59                                                                                                                | 1218 (10.4)    | 732 (9.3)   | 389 (14.5)           |                |
| 60 – 89                                                                                                                | 8452 (71.9)    | 5716 (72.4) | 1866 (69.7)          |                |
| 90 – 109                                                                                                               | 1823 (15.5)    | 1268 (16.1) | 355 (13.3)           |                |
| > 109                                                                                                                  | 216 (1.8)      | 157 (2.0)   | 43 (1.6)             |                |
| Oxygen saturation (%)                                                                                                  |                |             |                      | <0.001         |
| < 60                                                                                                                   | 67 (0.6)       | 20 (0.3)    | 43 (1.6)             |                |
| 60 – 69                                                                                                                | 57 (0.5)       | 16 (0.2)    | 38 (1.4)             |                |
| 70 – 79                                                                                                                | 206 (1.8)      | 74 (0.9)    | 121 (4.4)            |                |
| 80 – 89                                                                                                                | 1313 (11.2)    | 633 (8.0)   | 585 (21.5)           |                |
| 90 – 95                                                                                                                | 4768 (40.6)    | 3218 (40.9) | 1138 (41.7)          |                |
| 96 – 100                                                                                                               | 5330 (45.4)    | 3904 (49.6) | 802 (29.4)           |                |
| <b>Laboratory values at admission</b>                                                                                  |                |             |                      |                |
| CRP (mg/L)                                                                                                             |                |             |                      | <0.001         |
| < 3                                                                                                                    | 540 (4.7)      | 310 (4.1)   | 42 (1.6)             |                |
| 3 – 29                                                                                                                 | 2664 (23.2)    | 1844 (24.3) | 335 (12.4)           |                |
| 30 – 69                                                                                                                | 2605 (22.7)    | 1945 (25.6) | 446 (16.5)           |                |
| 70 – 119                                                                                                               | 2225 (19.4)    | 1561 (20.6) | 524 (19.4)           |                |
| 120 – 179                                                                                                              | 1657 (14.4)    | 1045 (13.8) | 514 (19.0)           |                |
| 180 – 249                                                                                                              | 965 (8.4)      | 539 (7.1)   | 391 (14.5)           |                |



|                                               |             |             |             |        |
|-----------------------------------------------|-------------|-------------|-------------|--------|
| > 249                                         | 812 (7.1)   | 347 (4.6)   | 453 (16.7)  |        |
| White blood cell count (x 10 <sup>9</sup> /L) |             |             |             | <0.001 |
| < 1.0                                         | 33 (0.3)    | 22 (0.3)    | 8 (0.3)     |        |
| 1.0 – 3.9                                     | 1327 (11.5) | 914 (12.0)  | 248 (9.2)   |        |
| 4.0 – 7.9                                     | 6110 (53.0) | 4171 (54.8) | 1218 (44.9) |        |
| 8.0 – 11.9                                    | 2773 (24.1) | 1793 (23.6) | 764 (28.2)  |        |
| 12.0 – 15.9                                   | 935 (8.1)   | 515 (6.8)   | 350 (12.9)  |        |
| 16.0 – 19.9                                   | 288 (2.5)   | 175 (2.3)   | 99 (3.7)    |        |
| > 20                                          | 60 (0.5)    | 22 (0.3)    | 23 (0.8)    |        |
| Lymphocyte count (x 10 <sup>9</sup> /L)       |             |             |             | <0.001 |
| < 0.1                                         | 70 (0.7)    | 34 (0.5)    | 21 (1.0)    |        |
| 0.10 – 0.29                                   | 333 (3.5)   | 206 (3.1)   | 94 (4.5)    |        |
| 0.30 – 0.49                                   | 931 (9.7)   | 597 (9.0)   | 263 (12.7)  |        |
| 0.50 – 0.79                                   | 2447 (25.5) | 1620 (24.5) | 626 (30.2)  |        |
| 0.80 – 1.49                                   | 4175 (43.4) | 2953 (44.7) | 839 (40.4)  |        |
| 1.50 – 2.99                                   | 1480 (15.4) | 1077 (16.3) | 196 (9.4)   |        |
| > 3.0                                         | 176 (1.8)   | 116 (1.8)   | 37 (1.8)    |        |
| Hemoglobin (mmol/L)                           |             |             |             | 0.013  |
| < 3.73                                        | 31 (0.3)    | 19 (0.2)    | 5 (0.2)     |        |
| 3.73 – 4.90                                   | 180 (1.6)   | 112 (1.5)   | 47 (1.7)    |        |
| 4.91 – 6.15                                   | 764 (6.6)   | 475 (6.2)   | 222 (8.1)   |        |
| 6.16 – 7.39                                   | 2101 (18.2) | 1371 (18.0) | 499 (18.2)  |        |
| 7.4 – 9.25                                    | 6469 (56.0) | 4312 (56.5) | 1475 (53.9) |        |
| >= 9.25                                       | 2010 (17.4) | 1348 (17.7) | 491 (17.9)  |        |
| Platelets (x 10 <sup>9</sup> /L)              |             |             |             | 0.073  |
| < 10                                          | 25 (0.2)    | 10 (0.1)    | 11 (0.4)    |        |
| 10 – 49                                       | 98 (0.9)    | 58 (0.8)    | 24 (0.9)    |        |
| 50 – 119                                      | 931 (8.4)   | 595 (8.2)   | 241 (9.1)   |        |
| 120 – 449                                     | 9681 (87.2) | 6386 (87.5) | 2275 (86.2) |        |
| 450 – 799                                     | 350 (3.2)   | 240 (3.3)   | 86 (3.3)    |        |
| 800 – 1199                                    | 11 (0.1)    | 8 (0.1)     | 3 (0.1)     |        |

CRP = C-Reactive Protein; IQR = Interquartile Range

| <b>Table S7: Baseline characteristics stratified by mortality</b> |                |                         |                              |                |
|-------------------------------------------------------------------|----------------|-------------------------|------------------------------|----------------|
|                                                                   | <b>Overall</b> | <b>Discharged alive</b> | <b>Died during admission</b> | <b>P-value</b> |
| Total                                                             | 16511          | 13169                   | 3342                         |                |
| <b>Age, years (%)</b>                                             |                |                         |                              | <0.001         |
| 18 – 25                                                           | 239 (1.4)      | 237 (1.8)               | 2 (0.1)                      |                |
| 26 – 35                                                           | 704 (4.3)      | 681 (5.2)               | 23 (0.7)                     |                |
| 36 – 45                                                           | 1128 (6.8)     | 1080 (8.2)              | 48 (1.4)                     |                |
| 46 – 55                                                           | 2299 (13.9)    | 2139 (16.2)             | 160 (4.8)                    |                |
| 56 – 65                                                           | 3280 (19.9)    | 2873 (21.8)             | 407 (12.2)                   |                |
| 66 – 75                                                           | 3485 (21.1)    | 2679 (20.3)             | 806 (24.1)                   |                |
| 76 – 85                                                           | 3720 (22.5)    | 2476 (18.8)             | 1244 (37.2)                  |                |
| >85                                                               | 1656 (10.0)    | 1004 (7.6)              | 652 (19.5)                   |                |
| <b>Sex, female (%)</b>                                            | 6627 (40.2)    | 5489 (41.7)             | 1138 (34.1)                  | <0.001         |
| <b>Ethnicity</b>                                                  |                |                         |                              | 0.001          |
| Arab                                                              | 496 (3.5)      | 423 (3.7)               | 73 (2.5)                     |                |
| Asian                                                             | 898 (6.3)      | 727 (6.4)               | 171 (5.8)                    |                |
| Black                                                             | 384 (2.7)      | 322 (2.8)               | 62 (2.1)                     |                |
| Latin-American                                                    | 21 (0.1)       | 18 (0.2)                | 3 (0.1)                      |                |
| White                                                             | 12120 (84.5)   | 9545 (83.9)             | 2575 (87.0)                  |                |
| Other                                                             | 416 (2.9)      | 339 (3.0)               | 77 (2.6)                     |                |
| <b>BMI (kg/m<sup>2</sup>)</b>                                     |                |                         |                              | <0.001         |
| Underweight (<18.5)                                               | 239 (2.3)      | 168 (2.0)               | 71 (3.5)                     |                |
| Normal weight (18.5 – 24.9)                                       | 3091 (29.7)    | 2464 (29.4)             | 627 (30.8)                   |                |
| Overweight (25.0 – 29.9)                                          | 3854 (37.0)    | 3092 (36.9)             | 762 (37.5)                   |                |
| Obese (30.0 – 34.9)                                               | 2069 (19.9)    | 1706 (20.4)             | 363 (17.9)                   |                |
| Morbidly obese (> 34.9)                                           | 1157 (11.1)    | 947 (11.3)              | 210 (10.3)                   |                |
| <b>Cardiovascular risk factors</b>                                |                |                         |                              |                |
| Diabetes                                                          | 4031 (24.9)    | 2966 (22.9)             | 1065 (32.9)                  | <0.001         |
| Hypertension                                                      | 7975 (49.5)    | 6013 (46.6)             | 1962 (60.8)                  | <0.001         |
| Peripheral arterial disease                                       | 654 (4.8)      | 450 (4.0)               | 204 (7.9)                    | <0.001         |
| <b>Cardiac disease</b>                                            |                |                         |                              |                |
| Any history of cardiac disease                                    | 5198 (31.5)    | 3653 (27.7)             | 1545 (46.2)                  | <0.001         |
| Arrhythmia/conduction disorder                                    | 2503 (15.3)    | 1714 (13.1)             | 789 (23.9)                   | <0.001         |
| Atrial fibrillation/flutter                                       | 2004 (12.3)    | 1358 (10.4)             | 646 (19.6)                   | <0.001         |
| Coronary artery disease                                           | 2420 (14.8)    | 1676 (12.8)             | 744 (22.7)                   | <0.001         |
| Myocardial infarction                                             | 769 (4.8)      | 537 (4.1)               | 232 (7.2)                    | <0.001         |
| Heart failure                                                     | 1314 (8.1)     | 825 (6.3)               | 489 (14.9)                   | <0.001         |
| NYHA I/II                                                         | 324 (2.0)      | 221 (1.7)               | 103 (3.1)                    | <0.001         |
| NYHA III/IV                                                       | 246 (1.5)      | 139 (1.1)               | 107 (3.2)                    | <0.001         |
| Valvular heart disease                                            | 579 (3.6)      | 388 (3.0)               | 191 (5.8)                    | <0.001         |
| <b>Comorbidities</b>                                              |                |                         |                              |                |
| Chronic kidney disease                                            | 2196 (13.5)    | 1460 (11.2)             | 736 (22.6)                   | <0.001         |
| COPD                                                              | 1563 (9.6)     | 1044 (8.1)              | 519 (16.0)                   | <0.001         |
| <b>Use cardiovascular drugs</b>                                   |                |                         |                              |                |
| ACE-inhibitors                                                    | 3021 (18.8)    | 2318 (18.0)             | 703 (22.2)                   | <0.001         |
| Aldosterone antagonist                                            | 563 (3.5)      | 412 (3.2)               | 151 (4.7)                    | <0.001         |
| Anti-platelet                                                     | 3044 (18.7)    | 2230 (17.1)             | 814 (25.1)                   | <0.001         |
| Angiotensin receptor blocker                                      | 2159 (13.5)    | 1719 (13.4)             | 440 (13.9)                   | 0.465          |
| Calcium-blocker                                                   | 2769 (17.0)    | 2140 (16.4)             | 629 (19.5)                   | <0.001         |
| Diuretic                                                          | 3338 (20.5)    | 2351 (18.1)             | 987 (30.5)                   | <0.001         |
| Insulin                                                           | 1204 (7.4)     | 879 (6.7)               | 325 (9.9)                    | <0.001         |
| Lipid-lowering                                                    | 4789 (30.5)    | 3587 (28.5)             | 1202 (38.6)                  | <0.001         |
| Oral anti-diabetic                                                | 2139 (13.0)    | 1609 (12.2)             | 530 (15.9)                   | <0.001         |

ACE = Angiotensin Converting Enzyme; BMI = Body Mass Index; COPD = Chronic Obstructive Pulmonary Disease; NYHA = New York Heart Association

| <b>Table S8: Complaints, vitals and laboratory values at admission stratified by mortality</b> |                |                         |                              |                |
|------------------------------------------------------------------------------------------------|----------------|-------------------------|------------------------------|----------------|
|                                                                                                | <b>Overall</b> | <b>Discharged alive</b> | <b>Died during admission</b> | <b>P-value</b> |
| Total                                                                                          | 16511          | 13169                   | 3342                         |                |
| <b>Admission</b>                                                                               |                |                         |                              |                |
| Onset of symptoms to admission, days, median, [IQR]                                            | 6 [2 – 9]      | 6 [2 – 10]              | 4 [1 – 7]                    | <0.001         |
| <b>Complaints at admission</b>                                                                 |                |                         |                              |                |
| Anosmia                                                                                        | 723 (4.6)      | 666 (5.3)               | 57 (1.8)                     | <0.001         |
| Cough                                                                                          | 8158 (51.8)    | 6660 (52.9)             | 1498 (47.5)                  | <0.001         |
| Dyspnea                                                                                        | 7798 (49.8)    | 5996 (47.9)             | 1802 (57.5)                  | <0.001         |
| Fatigue                                                                                        | 4214 (26.8)    | 3345 (26.6)             | 869 (27.5)                   | 0.288          |
| Fever                                                                                          | 8638 (54.9)    | 6944 (55.2)             | 1694 (53.7)                  | 0.135          |
| Gastrointestinal symptoms                                                                      | 3030 (19.2)    | 2494 (19.8)             | 536 (17.0)                   | <0.001         |
| Palpitations                                                                                   | 162 (1.0)      | 131 (1.0)               | 31 (1.0)                     | 0.847          |
| Sore throat                                                                                    | 1108 (7.0)     | 943 (7.5)               | 165 (5.2)                    | <0.001         |
| <b>Vitals at admission</b>                                                                     |                |                         |                              |                |
| Temperature (°C)                                                                               |                |                         |                              | <0.001         |
| < 35.1                                                                                         | 72 (0.6)       | 42 (0.4)                | 30 (1.3)                     |                |
| 35.1 – 37.2                                                                                    | 4898 (41.7)    | 3980 (42.4)             | 918 (39.1)                   |                |
| 37.3 – 37.9                                                                                    | 2546 (21.7)    | 2049 (21.8)             | 497 (21.1)                   |                |
| 38.0 – 38.9                                                                                    | 2920 (24.9)    | 2300 (24.5)             | 620 (26.4)                   |                |
| 39.0 – 39.9                                                                                    | 1139 (9.7)     | 891 (9.5)               | 248 (10.6)                   |                |
| > 39.9                                                                                         | 158 (1.3)      | 121 (1.3)               | 37 (1.6)                     |                |
| Respiratory rate (breaths/min)                                                                 |                |                         |                              | <0.001         |
| < 16                                                                                           | 1168 (10.8)    | 1014 (11.8)             | 154 (7.0)                    |                |
| 16 – 21                                                                                        | 4914 (45.4)    | 4165 (48.4)             | 749 (33.8)                   |                |
| 22 – 29                                                                                        | 3219 (29.8)    | 2431 (28.3)             | 788 (35.6)                   |                |
| > 29                                                                                           | 1512 (14.0)    | 989 (11.5)              | 523 (23.6)                   |                |
| Heart rate (beats/min)                                                                         |                |                         |                              | <0.001         |
| < 45                                                                                           | 51 (0.4)       | 40 (0.4)                | 11 (0.5)                     |                |
| 45 – 59                                                                                        | 293 (2.5)      | 226 (2.4)               | 67 (2.8)                     |                |
| 60 – 89                                                                                        | 6037 (51.2)    | 4904 (52.1)             | 1133 (48.0)                  |                |
| 90 – 119                                                                                       | 4627 (39.3)    | 3728 (39.6)             | 899 (38.1)                   |                |
| > 119                                                                                          | 775 (6.6)      | 523 (5.6)               | 252 (10.7)                   |                |
| Systolic blood pressure (mmHg)                                                                 |                |                         |                              | <0.001         |
| < 80                                                                                           | 79 (0.7)       | 44 (0.5)                | 35 (1.5)                     |                |
| 80 – 99                                                                                        | 566 (4.8)      | 402 (4.3)               | 164 (6.9)                    |                |
| 100 – 119                                                                                      | 2606 (22.1)    | 2051 (21.8)             | 555 (23.5)                   |                |
| 120 – 139                                                                                      | 4291 (36.5)    | 3554 (37.8)             | 737 (31.2)                   |                |
| 140 – 179                                                                                      | 3827 (32.5)    | 3047 (32.4)             | 780 (33.0)                   |                |
| > 179                                                                                          | 403 (3.4)      | 310 (3.3)               | 93 (3.9)                     |                |
| Diastolic blood pressure (mmHg)                                                                |                |                         |                              | <0.001         |
| < 40                                                                                           | 44 (0.4)       | 26 (0.3)                | 18 (0.8)                     |                |
| 40 – 59                                                                                        | 1218 (10.4)    | 832 (8.9)               | 386 (16.4)                   |                |
| 60 – 89                                                                                        | 8452 (71.9)    | 6816 (72.6)             | 1636 (69.4)                  |                |
| 90 – 109                                                                                       | 1823 (15.5)    | 1559 (16.6)             | 264 (11.2)                   |                |
| > 109                                                                                          | 216 (1.8)      | 161 (1.7)               | 55 (2.3)                     |                |
| Oxygen saturation (%)                                                                          |                |                         |                              | <0.001         |
| < 60                                                                                           | 67 (0.6)       | 31 (0.3)                | 36 (1.5)                     |                |
| 60 – 69                                                                                        | 57 (0.5)       | 23 (0.2)                | 34 (1.4)                     |                |
| 70 – 79                                                                                        | 206 (1.8)      | 95 (1.0)                | 111 (4.7)                    |                |
| 80 – 89                                                                                        | 1313 (11.2)    | 861 (9.2)               | 452 (19.1)                   |                |
| 90 – 95                                                                                        | 4768 (40.6)    | 3800 (40.5)             | 968 (40.9)                   |                |
| 96 – 100                                                                                       | 5330 (45.4)    | 4563 (48.7)             | 767 (32.4)                   |                |
| <b>Laboratory values at admission</b>                                                          |                |                         |                              |                |
| CRP (mg/L)                                                                                     |                |                         |                              | <0.001         |
| < 3                                                                                            | 540 (4.7)      | 512 (5.6)               | 28 (1.2)                     |                |
| 3 – 29                                                                                         | 2664 (23.2)    | 2363 (25.8)             | 301 (13.0)                   |                |
| 30 – 69                                                                                        | 2605 (22.7)    | 2146 (23.5)             | 459 (19.8)                   |                |
| 70 – 119                                                                                       | 2225 (19.4)    | 1734 (19.0)             | 491 (21.1)                   |                |
| 120 – 179                                                                                      | 1657 (14.4)    | 1215 (13.3)             | 442 (19.0)                   |                |

|                                               |             |             |             |        |
|-----------------------------------------------|-------------|-------------|-------------|--------|
| 180 – 249                                     | 965 (8.4)   | 662 (7.2)   | 303 (13.0)  |        |
| > 249                                         | 812 (7.1)   | 513 (5.6)   | 299 (12.9)  |        |
| White blood cell count (x 10 <sup>9</sup> /L) |             |             |             | <0.001 |
| < 1.0                                         | 33 (0.3)    | 24 (0.3)    | 9 (0.4)     |        |
| 1.0 – 3.9                                     | 1327 (11.5) | 1106 (12.0) | 221 (9.5)   |        |
| 4.0 – 7.9                                     | 6110 (53.0) | 5034 (54.7) | 1076 (46.5) |        |
| 8.0 – 11.9                                    | 2773 (24.1) | 2181 (23.7) | 592 (25.6)  |        |
| 12.0 – 15.9                                   | 935 (8.1)   | 643 (7.0)   | 292 (12.6)  |        |
| 16.0 – 19.9                                   | 288 (2.5)   | 186 (2.0)   | 102 (4.4)   |        |
| > 20                                          | 60 (0.5)    | 37 (0.4)    | 23 (1.0)    |        |
| Lymphocyte count (x 10 <sup>9</sup> /L)       |             |             |             | <0.001 |
| < 0.1                                         | 70 (0.7)    | 46 (0.6)    | 24 (1.2)    |        |
| 0.10 – 0.29                                   | 333 (3.5)   | 204 (2.7)   | 129 (6.6)   |        |
| 0.30 – 0.49                                   | 931 (9.7)   | 638 (8.3)   | 293 (15.0)  |        |
| 0.50 – 0.79                                   | 2447 (25.5) | 1851 (24.2) | 596 (30.5)  |        |
| 0.80 – 1.49                                   | 4175 (43.4) | 3486 (45.5) | 689 (35.2)  |        |
| 1.50 – 2.99                                   | 1480 (15.4) | 1290 (16.8) | 190 (9.7)   |        |
| > 3.0                                         | 176 (1.8)   | 142 (1.9)   | 34 (1.7)    |        |
| Hemoglobin (mmol/L)                           |             |             |             | <0.001 |
| < 3.73                                        | 31 (0.3)    | 17 (0.2)    | 14 (0.6)    |        |
| 3.73 – 4.90                                   | 180 (1.6)   | 137 (1.5)   | 43 (1.8)    |        |
| 4.91 – 6.15                                   | 764 (6.6)   | 526 (5.7)   | 238 (10.2)  |        |
| 6.16 – 7.39                                   | 2101 (18.2) | 1584 (17.2) | 517 (22.1)  |        |
| 7.4 – 9.25                                    | 6469 (56.0) | 5275 (57.2) | 1194 (51.0) |        |
| >= 9.25                                       | 2010 (17.4) | 1677 (18.2) | 333 (14.2)  |        |
| Platelets (x 10 <sup>9</sup> /L)              |             |             |             | <0.001 |
| < 10                                          | 25 (0.2)    | 15 (0.2)    | 10 (0.4)    |        |
| 10 – 49                                       | 98 (0.9)    | 75 (0.8)    | 23 (1.0)    |        |
| 50 – 119                                      | 931 (8.4)   | 651 (7.3)   | 280 (12.5)  |        |
| 120 – 449                                     | 9681 (87.2) | 7827 (88.3) | 1854 (83.0) |        |
| 450 – 799                                     | 350 (3.2)   | 286 (3.2)   | 64 (2.9)    |        |
| 800 – 1199                                    | 11 (0.1)    | 9 (0.1)     | 2 (0.1)     |        |

CRP = C-Reactive Protein; IQR = Interquartile Range

| <b>Table S9: Outcome at discharge stratified by data source and age</b> |                |                       |                     |                  |                     |                |
|-------------------------------------------------------------------------|----------------|-----------------------|---------------------|------------------|---------------------|----------------|
|                                                                         | <b>Overall</b> | <b>CAPACITY-COVID</b> |                     | <b>LEOSS</b>     |                     | <b>P-value</b> |
|                                                                         |                | <b>≤65 years</b>      | <b>&gt;65 years</b> | <b>≤65 years</b> | <b>&gt;65 years</b> |                |
| Total                                                                   | 16511          | 4303                  | 5501                | 3347             | 3360                |                |
| <b>Admission</b>                                                        |                |                       |                     |                  |                     |                |
| Duration of hospitalization, days, median [IQR]                         | NA             | 8 [4 – 18]            | 9 [5 – 18]          | NA               | NA                  | NA             |
| Admission to a critical care unit                                       | 3916 (27.6)    | 1314 (30.5)           | 954 (17.3)          | 810 (37.2)       | 838 (37.7)          | <0.001         |
| Duration of stay critical care unit, days, median [IQR]                 | NA             | 12 [6 – 23]           | 12 [6 – 23]         | NA               | NA                  | NA             |
| <b>Treatment</b>                                                        |                |                       |                     |                  |                     |                |
| Invasive ventilation                                                    | 2680 (16.2)    | 1033 (24.1)           | 763 (13.9)          | 440 (13.2)       | 444 (13.2)          | <0.001         |
| Non-invasive ventilation                                                | 1818 (11.1)    | 723 (17.1)            | 526 (9.6)           | 284 (8.5)        | 285 (8.5)           | <0.001         |
| ECMO                                                                    | 316 (1.9)      | 106 (2.5)             | 16 (0.3)            | 145 (4.3)        | 49 (1.5)            | <0.001         |
| <b>Complications</b>                                                    |                |                       |                     |                  |                     |                |
| <b>Cardiac</b>                                                          |                |                       |                     |                  |                     |                |
| Endocarditis                                                            | NA             | 2 (0.0)               | 7 (0.1)             | NA               | NA                  | NA             |
| Heart failure de novo                                                   | 197 (1.2)      | 30 (0.7)              | 101 (1.8)           | 28 (0.8)         | 38 (1.1)            | <0.001         |
| Myocardial infarction                                                   | 95 (0.6)       | 14 (0.3)              | 32 (0.6)            | 11 (0.3)         | 38 (1.1)            | <0.001         |
| Myocarditis                                                             | 37 (0.2)       | 13 (0.3)              | 14 (0.3)            | 8 (0.2)          | 2 (0.1)             | 0.140          |
| Pericarditis                                                            | NA             | 13 (0.3)              | 2 (0.0)             | NA               | NA                  | NA             |
| Ventricular arrhythmia                                                  | NA             | 17 (0.4)              | 34 (0.6)            | NA               | NA                  | NA             |
| <b>Thromboembolic</b>                                                   |                |                       |                     |                  |                     |                |
| Pulmonary embolism                                                      | 569 (3.5)      | 238 (5.6)             | 218 (4.0)           | 56 (1.7)         | 57 (1.7)            | <0.001         |
| Stroke                                                                  | 106 (0.6)      | 21 (0.5)              | 50 (0.9)            | 5 (0.2)          | 30 (0.9)            | <0.001         |
| Venous thrombosis                                                       | 121 (0.7)      | 29 (0.7)              | 20 (0.4)            | 37 (1.1)         | 35 (1.1)            | <0.001         |
| <b>Outcome</b>                                                          |                |                       |                     |                  |                     |                |
| Deceased                                                                | 3342 (20.2)    | 422 (9.8)             | 1819 (33.1)         | 218 (6.5)        | 883 (26.3)          | <0.001         |

ECMO = Extracorporeal Membrane Oxygenation; IQR = Interquartile Range

| <b>Table S10: Outcome at discharge stratified by admission to a critical care unit</b> |                |             |                      |                |
|----------------------------------------------------------------------------------------|----------------|-------------|----------------------|----------------|
|                                                                                        | <b>Overall</b> | <b>Ward</b> | <b>Critical care</b> | <b>P-value</b> |
| Total                                                                                  | 16511          | 10287       | 3916                 |                |
| <b>Admission</b>                                                                       |                |             |                      |                |
| Duration of hospitalization, days, median [IQR]                                        | 9 [5 – 18]     | 7 [4 – 13]  | 21 [12 – 35]         | <0.001         |
| <b>Treatment</b>                                                                       |                |             |                      |                |
| Invasive ventilation                                                                   | 2680 (16.2)    | 0 (0.0)     | 2680 (68.7)          | <0.001         |
| Non-invasive ventilation                                                               | 1818 (11.1)    | 35 (0.3)    | 1783 (46.9)          | <0.001         |
| ECMO                                                                                   | 316 (1.9)      | 0 (0.0)     | 316 (8.2)            | <0.001         |
| <b>Complications</b>                                                                   |                |             |                      |                |
| <b>Cardiac</b>                                                                         |                |             |                      |                |
| Myocarditis                                                                            | 37 (0.2)       | 13 (0.1)    | 23 (0.6)             | <0.001         |
| Myocardial infarction                                                                  | 95 (0.6)       | 31 (0.3)    | 61 (1.6)             | <0.001         |
| Heart failure de novo                                                                  | 197 (1.2)      | 97 (0.9)    | 93 (2.4)             | <0.001         |
| <b>Thromboembolic</b>                                                                  |                |             |                      |                |
| Pulmonary embolism                                                                     | 569 (3.5)      | 144 (1.4)   | 405 (10.5)           | <0.001         |
| Stroke                                                                                 | 106 (0.6)      | 52 (0.5)    | 48 (1.2)             | <0.001         |
| Venous thrombosis                                                                      | 121 (0.7)      | 28 (0.3)    | 86 (2.2)             | <0.001         |
| <b>Outcome</b>                                                                         |                |             |                      |                |
| Deceased                                                                               | 3342 (20.2)    | 1799 (17.5) | 1317 (33.6)          | <0.001         |

ECMO = Extracorporeal Membrane Oxygenation; IQR = Interquartile Range

| <b>Table S11: Outcome at discharge stratified by mortality</b> |                |                         |                              |                |
|----------------------------------------------------------------|----------------|-------------------------|------------------------------|----------------|
|                                                                | <b>Overall</b> | <b>Discharged alive</b> | <b>Died during admission</b> | <b>P-value</b> |
| Total                                                          | 16511          | 13169                   | 3342                         |                |
| <b>Admission</b>                                               |                |                         |                              |                |
| Duration of hospitalization, days, median [IQR]                | 9 [5 – 18]     | 9 [5 – 18]              | 8 [5 – 16]                   | 0.002          |
| Admission to a critical care unit                              | 3916 (27.6)    | 2599 (23.4)             | 1317 (42.3)                  | <0.001         |
| Duration of stay critical care unit, days, median [IQR]        | 12 [6 – 23]    | 13 [6 – 25]             | 11 [6 – 19]                  | <0.001         |
| <b>Treatment</b>                                               |                |                         |                              |                |
| Invasive ventilation                                           | 2680 (16.2)    | 1608 (12.2)             | 1072 (32.1)                  | <0.001         |
| Non-invasive ventilation                                       | 1818 (11.1)    | 1267 (9.7)              | 551 (16.7)                   | <0.001         |
| ECMO                                                           | 316 (1.9)      | 148 (1.1)               | 168 (5.1)                    | <0.001         |
| <b>Complications</b>                                           |                |                         |                              |                |
| <b>Cardiac</b>                                                 |                |                         |                              |                |
| Myocarditis                                                    | 37 (0.2)       | 24 (0.2)                | 13 (0.4)                     | 0.039          |
| Myocardial infarction                                          | 95 (0.6)       | 40 (0.3)                | 55 (1.7)                     | <0.001         |
| Heart failure de novo                                          | 197 (1.2)      | 92 (0.7)                | 105 (3.1)                    | <0.001         |
| <b>Thromboembolic</b>                                          |                |                         |                              |                |
| Pulmonary embolism                                             | 569 (3.5)      | 404 (3.1)               | 165 (5.0)                    | <0.001         |
| Stroke                                                         | 106 (0.6)      | 63 (0.5)                | 43 (1.3)                     | <0.001         |
| Venous thrombosis                                              | 121 (0.7)      | 86 (0.7)                | 35 (1.1)                     | 0.021          |

ECMO = Extracorporeal Membrane Oxygenation; IQR = Interquartile Range

| <b>Table S12: Subgroup analyses of having any history of cardiac disease among clinically relevant subgroups</b> |                            |                    |                         |
|------------------------------------------------------------------------------------------------------------------|----------------------------|--------------------|-------------------------|
|                                                                                                                  | <b>p-value interaction</b> | <b>RR [95% CI]</b> | <b>p-value subgroup</b> |
| <b>Multivariable adjusted*</b>                                                                                   |                            |                    |                         |
| <b>Age</b>                                                                                                       | 0.10                       |                    |                         |
| ≤65 years                                                                                                        |                            | 1.25 [1.04 – 1.50] | 0.02                    |
| >65 years                                                                                                        |                            | 1.06 [0.99 – 1.13] | 0.08                    |
| <b>Sex</b>                                                                                                       | 0.09                       |                    |                         |
| Female                                                                                                           |                            | 1.16 [1.05 – 1.29] | <0.001                  |
| Male                                                                                                             |                            | 1.04 [0.97 – 1.12] | 0.25                    |
| <b>BMI (kg/m<sup>2</sup>)</b>                                                                                    | 0.18                       |                    |                         |
| <30                                                                                                              |                            | 1.11 [1.03 – 1.20] | 0.01                    |
| ≥30                                                                                                              |                            | 1.00 [0.87 -1.14]  | 0.98                    |
| <b>Diabetes</b>                                                                                                  | 0.27                       |                    |                         |
| No                                                                                                               |                            | 1.12 [1.03 – 1.20] | <0.001                  |
| Yes                                                                                                              |                            | 1.03 [0.93 – 1.14] | 0.52                    |
| <b>Hypertension</b>                                                                                              | 0.21                       |                    |                         |
| No                                                                                                               |                            | 1.14 [1.03 – 1.26] | 0.01                    |
| Yes                                                                                                              |                            | 1.05 [0.98 – 1.14] | 0.18                    |
| <b>Chronic kidney disease</b>                                                                                    | 0.33                       |                    |                         |
| No                                                                                                               |                            | 1.10 [1.02 – 1.18] | 0.01                    |
| Yes                                                                                                              |                            | 1.03 [0.91 – 1.16] | 0.69                    |
| <b>COPD</b>                                                                                                      | 0.54                       |                    |                         |
| No                                                                                                               |                            | 1.07 [1.00 – 1.15] | 0.04                    |
| Yes                                                                                                              |                            | 1.13 [0.98 – 1.30] | 0.10                    |

\* Multivariable models are adjusted for the following covariates: age, sex, BMI, hypertension, CKD, COPD, diabetes and region of inclusion (Central Europe, Middle – East, Netherlands/Belgium, Russia, Southern – Europe and the United Kingdom).



**Table S13: Sensitivity analyses between centers with and without a selective inclusion strategy**

|                                 | Total cohort       |          | Cohort with exclusion of patients included from centers with selective inclusion |          |
|---------------------------------|--------------------|----------|----------------------------------------------------------------------------------|----------|
|                                 | RR [95% CI]        | p-value* | RR [95% CI]                                                                      | p-value* |
| <b>Crude</b>                    |                    |          |                                                                                  |          |
| Any cardiac history             | 1.87 [1.76 – 1.99] | <0.01    | 1.89 [1.78 – 2.01]                                                               | <0.01    |
| Arrhythmia/conduction disorder  | 1.73 [1.62 – 1.85] | <0.01    | 1.75 [1.63 – 1.88]                                                               | <0.01    |
| Atrial fibrillation             | 1.73 [1.61 – 1.86] | <0.01    | 1.76 [1.63 – 1.89]                                                               | <0.01    |
| Coronary artery disease         | 1.68 [1.57 – 1.80] | <0.01    | 1.70 [1.58 – 1.83]                                                               | <0.01    |
| Myocardial infarction           | 1.55 [1.39 – 1.74] | <0.01    | 1.56 [1.39 – 1.75]                                                               | <0.01    |
| Heart failure                   | 1.99 [1.84 – 2.15] | <0.01    | 2.00 [1.84 – 2.16]                                                               | <0.01    |
| NYHA I/II                       | 1.72 [1.47 – 2.02] | <0.01    | 1.72 [1.46 – 2.02]                                                               | <0.01    |
| NYHA III/IV                     | 2.37 [2.06 – 2.74] | <0.01    | 2.39 [2.07 – 2.76]                                                               | <0.01    |
| Valvular disease                | 1.68 [1.49 – 1.89] | <0.01    | 1.68 [1.47 – 1.91]                                                               | <0.01    |
| <b>Age and sex adjusted</b>     |                    |          |                                                                                  |          |
| Any cardiac history             | 1.13 [1.06 – 1.20] | <0.018   | 1.13 [1.07 – 1.21]                                                               | <0.018   |
| Arrhythmia/conduction disorder  | 1.06 [0.99 – 1.13] | 0.72     | 1.06 [0.99 – 1.14]                                                               | 0.90     |
| Atrial fibrillation             | 1.07 [1.00 – 1.15] | 0.70     | 1.08 [1.00 – 1.16]                                                               | 0.50     |
| Coronary artery disease         | 1.14 [1.06 – 1.22] | <0.018   | 1.14 [1.06 – 1.22]                                                               | <0.018   |
| Myocardial infarction           | 1.10 [0.99 – 1.22] | 0.72     | 1.09 [0.98 – 1.22]                                                               | 0.96     |
| Heart failure                   | 1.31 [1.21 – 1.42] | <0.018   | 1.30 [1.20 – 1.41]                                                               | <0.018   |
| NYHA I/II                       | 1.16 [0.98 – 1.36] | 0.72     | 1.14 [0.97 – 1.35]                                                               | 0.96     |
| NYHA III/IV                     | 1.53 [1.32 – 1.78] | <0.018   | 1.53 [1.31 – 1.77]                                                               | <0.018   |
| Valvular disease                | 1.11 [0.98 – 1.25] | 0.72     | 1.10 [0.97 – 1.25]                                                               | 0.96     |
| <b>Multivariable adjusted**</b> |                    |          |                                                                                  |          |
| Any cardiac disease             | 1.08 [1.02 – 1.15] | 0.12     | 1.09 [1.02 – 1.17]                                                               | 0.12     |
| Arrhythmia/conduction disorder  | 1.01 [0.94 – 1.08] | 1.00     | 1.02 [0.95 – 1.10]                                                               | 1.00     |
| Atrial fibrillation             | 1.04 [0.97 – 1.12] | 1.00     | 1.05 [0.97 – 1.14]                                                               | 0.96     |
| Coronary artery disease         | 1.10 [1.03 – 1.18] | 0.12     | 1.11 [1.03 – 1.19]                                                               | 0.12     |
| Myocardial infarction           | 1.07 [0.96 – 1.19] | 1.00     | 1.07 [0.95 – 1.19]                                                               | 1.00     |
| Heart failure                   | 1.19 [1.10 – 1.30] | <0.018   | 1.19 [1.10 – 1.30]                                                               | <0.018   |
| NYHA I/II                       | 1.05 [0.90 – 1.24] | 1.00     | 1.04 [0.89 – 1.23]                                                               | 1.00     |
| NYHA III/IV                     | 1.41 [1.20 – 1.64] | <0.018   | 1.41 [1.21 – 1.65]                                                               | <0.018   |
| Valvular disease                | 1.03 [0.91 – 1.16] | 1.00     | 1.02 [0.90 – 1.16]                                                               | 1.00     |

\* p-values are adjusted for multiple testing by the Holm-Bonferroni method.

\*\* Multivariable models are adjusted for the following covariates: age, sex, BMI, hypertension, CKD, COPD, diabetes and region of inclusion (Central Europe, Middle – East, Netherlands/Belgium, Russia, Southern – Europe and the United Kingdom). The models testing the association between a specific heart disease subtype and in-hospital mortality are also adjusted for the presence of other cardiac comorbidities (i.e. the model testing the association between heart failure and in-hospital mortality is adjusted for arrhythmia/conduction disorder, coronary artery disease and valvular disease).

| <b>Table S14: Associations across data sources between pre-existent heart disease subtypes and in-hospital mortality</b> |                       |                 |                    |                 |                    |                 |
|--------------------------------------------------------------------------------------------------------------------------|-----------------------|-----------------|--------------------|-----------------|--------------------|-----------------|
|                                                                                                                          | <b>CAPACITY-COVID</b> |                 | <b>LEOSS</b>       |                 | <b>Total</b>       |                 |
|                                                                                                                          | <b>RR [95% CI]</b>    | <b>p-value*</b> | <b>RR [95% CI]</b> | <b>p-value*</b> | <b>RR [95% CI]</b> | <b>p-value*</b> |
| <b>Crude</b>                                                                                                             |                       |                 |                    |                 |                    |                 |
| Any cardiac history                                                                                                      | 1.60 [1.49 – 1.72]    | <0.01           | 2.43 [2.19 – 2.70] | <0.01           | 1.87 [1.76 – 1.99] | <0.01           |
| Arrhythmia/conduction disorder                                                                                           | 1.57 [1.44 – 1.70]    | <0.01           | 2.10 [1.87 – 2.35] | <0.01           | 1.73 [1.62 – 1.85] | <0.01           |
| Atrial fibrillation                                                                                                      | 1.61 [1.47 – 1.76]    | <0.01           | 2.09 [1.86 – 2.35] | <0.01           | 1.73 [1.61 – 1.86] | <0.01           |
| Coronary artery disease                                                                                                  | 1.49 [1.37 – 1.63]    | <0.01           | 2.14 [1.91 – 2.39] | <0.01           | 1.68 [1.57 – 1.80] | <0.01           |
| Myocardial infarction                                                                                                    | 1.35 [1.16 – 1.58]    | <0.01           | 1.98 [1.70 – 2.32] | <0.01           | 1.55 [1.39 – 1.74] | <0.01           |
| Heart failure                                                                                                            | 1.76 [1.59 – 1.94]    | <0.01           | 2.52 [2.23 – 2.85] | <0.01           | 1.99 [1.84 – 2.15] | <0.01           |
| NYHA I/II                                                                                                                | 1.58 [1.34 – 1.87]    | <0.01           | 2.02 [1.55 – 2.63] | <0.01           | 1.72 [1.47 – 2.02] | <0.01           |
| NYHA III/IV                                                                                                              | 2.17 [1.76 – 2.67]    | <0.01           | 2.94 [2.46 – 3.52] | <0.01           | 2.37 [2.06 – 2.74] | <0.01           |
| Valvular disease                                                                                                         | 1.54 [1.34 – 1.76]    | <0.01           | 1.87 [1.46 – 2.40] | <0.01           | 1.68 [1.49 – 1.89] | <0.01           |
| <b>Age and sex adjusted</b>                                                                                              |                       |                 |                    |                 |                    |                 |
| Any cardiac history                                                                                                      | 1.04 [0.97 – 1.12]    | 1.00            | 1.30 [1.17 – 1.46] | <0.018          | 1.13 [1.06 – 1.20] | <0.018          |
| Arrhythmia/conduction disorder                                                                                           | 1.03 [0.95 – 1.12]    | 1.00            | 1.14 [1.01 – 1.27] | 0.24            | 1.06 [0.99 – 1.13] | 0.72            |
| Atrial fibrillation                                                                                                      | 1.06 [0.97 – 1.16]    | 1.00            | 1.15 [1.03 – 1.29] | 0.20            | 1.07 [1.00 – 1.15] | 0.70            |
| Coronary artery disease                                                                                                  | 1.07 [0.98 – 1.17]    | 1.00            | 1.30 [1.16 – 1.46] | <0.018          | 1.14 [1.06 – 1.22] | <0.018          |
| Myocardial infarction                                                                                                    | 1.0 [0.86 – 1.16]     | 1.00            | 1.29 [1.10 – 1.51] | <0.018          | 1.10 [0.99 – 1.22] | 0.72            |
| Heart failure                                                                                                            | 1.22 [1.11 – 1.35]    | <0.018          | 1.51 [1.33 – 1.71] | <0.018          | 1.31 [1.21 – 1.42] | <0.018          |
| NYHA I/II                                                                                                                | 1.11 [0.94 – 1.32]    | 1.00            | 1.24 [0.95 – 1.63] | 0.91            | 1.16 [0.98 – 1.36] | 0.72            |
| NYHA III/IV                                                                                                              | 1.48 [1.19 – 1.84]    | <0.018          | 1.72 [1.42 – 2.08] | <0.018          | 1.53 [1.32 – 1.78] | <0.018          |
| Valvular disease                                                                                                         | 1.08 [0.95 – 1.24]    | 1.00            | 1.05 [0.83 – 1.34] | 1.00            | 1.11 [0.98 – 1.25] | 0.72            |
| <b>Multivariable adjusted**</b>                                                                                          |                       |                 |                    |                 |                    |                 |
| Any cardiac disease                                                                                                      | 1.03 [0.96 – 1.11]    | 1.00            | 1.18 [1.05 – 1.32] | <0.018          | 1.08 [1.02 – 1.15] | 0.12            |
| Arrhythmia/conduction disorder                                                                                           | 1.01 [0.93 – 1.11]    | 1.00            | 0.99 [0.88 – 1.12] | 1.00            | 1.01 [0.94 – 1.08] | 1.00            |
| Atrial fibrillation                                                                                                      | 1.04 [0.95 – 1.15]    | 1.00            | 1.01 [0.90 – 1.14] | 1.00            | 1.04 [0.97 – 1.12] | 1.00            |
| Coronary artery disease                                                                                                  | 1.05 [0.96 – 1.15]    | 1.00            | 1.16 [1.03 – 1.30] | 0.20            | 1.10 [1.03 – 1.18] | 0.12            |
| Myocardial infarction                                                                                                    | 0.98 [0.84 – 1.13]    | 1.00            | 1.13 [0.96 – 1.32] | 0.91            | 1.07 [0.96 – 1.19] | 1.00            |
| Heart failure                                                                                                            | 1.11 [1.00 – 1.24]    | 0.75            | 1.30 [1.13 – 1.49] | <0.018          | 1.19 [1.10 – 1.30] | <0.018          |
| NYHA I/II                                                                                                                | 1.02 [0.86 – 1.22]    | 1.00            | 1.11 [0.85 – 1.46] | 1.00            | 1.05 [0.90 – 1.24] | 1.00            |
| NYHA III/IV                                                                                                              | 1.33 [1.06 – 1.66]    | 0.32            | 1.45 [1.19 – 1.77] | <0.018          | 1.41 [1.20 – 1.64] | <0.018          |
| Valvular disease                                                                                                         | 1.06 [0.93 – 1.22]    | 1.00            | 0.94 [0.74 – 1.20] | 1.00            | 1.03 [0.91 – 1.16] | 1.00            |

\* p-values are adjusted for multiple testing by the Holm-Bonferroni method.

\*\* Multivariable models are adjusted for the following covariates: age, sex, BMI, hypertension, CKD, COPD, diabetes and region of inclusion (Central Europe, Middle – East, Netherlands/Belgium, Russia, Southern – Europe and the United Kingdom). The models testing the association between a specific heart disease subtype and in-hospital mortality are also adjusted for the presence of other cardiac comorbidities (i.e. the model testing the association between heart failure and in-hospital mortality is adjusted for arrhythmia/conduction disorder, coronary artery disease and valvular disease).

| <b>Table S15: Subgroup analyses for patients that were admitted to a critical care unit</b> |                            |                                           |                         |                                                  |                         |
|---------------------------------------------------------------------------------------------|----------------------------|-------------------------------------------|-------------------------|--------------------------------------------------|-------------------------|
|                                                                                             |                            | <b>Patients only admitted to the ward</b> |                         | <b>Patients admitted to a critical care unit</b> |                         |
|                                                                                             | <b>p-value interaction</b> | <b>RR [95% CI]</b>                        | <b>p-value subgroup</b> | <b>RR [95% CI]</b>                               | <b>p-value subgroup</b> |
| <b>Multivariable adjusted**</b>                                                             |                            |                                           |                         |                                                  |                         |
| Any cardiac disease                                                                         | <0.001                     | 1.26 [1.16 – 1.37]                        | <0.001                  | 0.96 [0.88 – 1.06]                               | 0.40                    |
| Arrhythmia/conduction disorder                                                              | <0.001                     | 1.17 [1.07 – 1.28]                        | <0.001                  | 0.82 [0.73 – 0.92]                               | <0.001                  |
| Atrial fibrillation                                                                         | <0.001                     | 1.22 [1.11 – 1.33]                        | <0.001                  | 0.80 [0.71 – 0.91]                               | <0.001                  |
| Coronary artery disease                                                                     | 0.07                       | 1.18 [1.08 – 1.29]                        | 0.08                    | 1.03 [0.93 – 1.15]                               | 0.55                    |
| Myocardial infarction                                                                       | 0.57                       | 1.12 [0.97 – 1.29]                        | 0.12                    | 1.05 [0.89 – 1.24]                               | 0.57                    |
| Heart failure                                                                               | 0.01                       | 1.29 [1.17 – 1.43]                        | <0.001                  | 1.00 [0.86 – 1.17]                               | 0.97                    |
| NYHA I/II                                                                                   | 0.07                       | 1.15 [0.98 – 1.35]                        | 0.10                    | 0.91 [0.71 – 1.17]                               | 0.46                    |
| NYHA III/IV                                                                                 | 0.01                       | 1.55 [1.28 – 1.87]                        | <0.001                  | 1.09 [0.88 – 1.35]                               | 0.41                    |
| Valvular disease                                                                            | <0.001                     | 1.23 [1.07 – 1.41]                        | <0.001                  | 0.72 [0.55 – 0.95]                               | 0.02                    |

\* Multivariable models are adjusted for the following covariates: age, sex, BMI, hypertension, CKD, COPD, diabetes and region of inclusion (Central Europe, Middle – East, Benelux, Russia, Southern – Europe and the United Kingdom). The models testing the association between a specific heart disease subtype and in-hospital mortality are also adjusted for the presence of other cardiac comorbidities (i.e. the model testing the association between heart failure and in-hospital mortality is adjusted for arrhythmia/conduction disorder, coronary artery disease and valvular disease).
